# Supplementary material for: Spatiotemporal Regulation of ΔNp63 by TGFβ-Regulated miRNAs Is Essential for Cancer Metastasis
Source: Oxford University Press journal article supplement (doi:10.1158/0008-5472.can-19-2733), 2020-04-20
Supplement: 00085472can192733-sup-228309_2_supp_6223172_q8lz77.xlsx [file 00085472can192733-sup-228309_2_supp_6223172_q8lz77.xlsx]

## Sheet: Sheet1
miRNA	DMSO1	DMSO2	DMSO3	DMSO4	TGFB1	TGFB2	TGFB3	TGFB4	logFC[TGFb/DMSO]	AveExpr	P.Value	adj.P.Val
hsa-miR-222-3p	9.46199	9.62857	9.5405	9.62983	11.4548	11.6111	11.4807	11.1257	1.85287	10.2865	1.08e-08	8.92e-06
hsa-miR-181a-5p	8.38172	8.35693	8.22739	8.45687	9.98175	10.0286	9.85216	9.70815	1.53694	8.96646	2.34e-08	9.7e-06
hsa-miR-190a-5p	5.02182	4.9782	4.81531	5.16784	6.3533	6.31411	6.3887	6.19846	1.31785	5.47445	2.68e-07	7.39e-05
hsa-miR-30d-5p	6.37808	6.54758	6.30306	6.26994	7.50578	7.69226	7.43352	7.38895	1.13046	6.86575	6.44e-07	0.000133241
hsa-miR-21-5p	11.4335	11.5695	11.4214	11.5071	12.8058	13.0058	12.9197	12.549	1.33723	12.0093	2.55e-06	0.000233201
hsa-miR-22-3p	8.29266	8.4893	8.3252	8.52514	9.38833	9.71008	9.40288	9.30199	1.04275	8.84631	2.18e-06	0.000233201
hsa-miR-29a-3p	10.678	10.6508	10.3356	10.7252	11.499	11.6489	11.596	11.5249	0.969794	11.0228	2.7e-06	0.000233201
hsa-miR-29b-3p	14.1485	14.1728	14.0629	13.9959	15.1583	15.197	15.055	14.9156	0.986455	14.5463	2.26e-06	0.000233201
hsa-miR-30a-5p	7.00548	7.34395	7.23639	7.18262	8.68371	8.8182	8.5062	8.22499	1.36617	7.69175	1.83e-06	0.000233201
hsa-miR-3195	5.62596	5.22601	5.23995	5.16784	6.56343	6.68378	6.29553	6.43827	1.18031	5.8943	2.82e-06	0.000233201
hsa-miR-146a-5p	8.21648	8.23023	8.25661	8.47515	9.2854	9.49463	9.12817	9.16305	0.973195	8.66725	3.89e-06	0.000292533
hsa-miR-31-5p	5.98202	6.33532	6.20369	5.95268	7.17564	7.24313	7.28632	7.08978	1.08029	6.59879	6.16e-06	0.000425167
hsa-miR-181b-5p+hsa-miR-181d-5p	6.37808	6.24457	6.20369	6.54378	7.46449	7.66105	7.34329	7.11513	1.05346	6.74176	7.37e-06	0.000469371
hsa-miR-361-3p	5.3821	5.50154	4.94405	5.27189	6.46219	6.41109	6.29553	6.15023	1.05487	5.61627	1.09e-05	0.000642141
hsa-miR-548d-5p	5.71302	5.50154	5.5133	5.36893	6.39785	6.2939	6.54259	6.22199	0.839882	5.90813	2.44e-05	0.00134929
hsa-miR-203a-3p	5.43428	5.50154	5.5133	5.0557	6.2838	6.50197	6.27616	6.24513	0.950557	5.72946	2.96e-05	0.00153
hsa-miR-23b-3p	7.05631	7.16747	7.20248	7.23505	8.06411	7.97839	7.82884	7.87785	0.771975	7.49858	3.24e-05	0.0015795
hsa-miR-200a-3p	7.45396	7.43705	7.59777	7.52203	8.25781	8.09975	8.07857	8.20742	0.658184	7.76309	7.47e-05	0.00309371
hsa-miR-4516	7.20639	6.77211	7.09565	6.95147	8.23344	7.99726	7.83548	7.69662	0.934291	7.36977	7.37e-05	0.00309371
hsa-miR-182-5p	5.30011	5.9086	5.61994	5.54539	6.44106	6.92621	6.42434	6.31243	0.932502	6.00294	8.62e-05	0.00339823
hsa-miR-424-5p	5.3821	6.06528	6.00156	5.75141	6.83044	6.99039	7.05576	6.66116	1.08435	6.14587	9.21e-05	0.00346497
hsa-miR-574-5p	5.75466	5.50154	5.9817	5.91032	6.74681	6.83126	6.47621	6.37672	0.820695	6.14185	0.000102221	0.00367996
hsa-miR-200b-3p	8.44667	8.61054	8.61997	8.51457	9.30891	9.34555	9.13894	9.10097	0.675655	8.80518	0.000154295	0.00532318
hsa-miR-454-3p	5.3821	5.18755	5.45688	5.57281	6.13385	6.1884	6.37054	6.39753	0.872746	5.74383	0.000163859	0.00542701
hsa-miR-503-5p	5.08847	5.50154	5.81213	5.7026	6.33051	6.84522	6.31465	6.51646	0.975524	5.93806	0.000171438	0.00545964
hsa-miR-141-3p	8.49967	8.71563	8.67666	8.46055	9.36047	9.62772	9.42944	9.13545	0.800141	8.90753	0.000199229	0.0061097
hsa-miR-26b-5p	6.4175	6.37008	6.64362	6.41335	7.27451	6.93928	7.03285	7.16453	0.641654	6.73149	0.000209159	0.00618515
hsa-miR-208a-3p	4.3901	4.37088	4.85951	4.84695	5.34832	5.84388	5.42354	5.39398	0.885566	5.16825	0.00024902	0.00689785
hsa-miR-575	5.83449	5.50154	5.23995	5.62613	6.54374	6.74459	6.27616	6.35561	0.929495	5.9543	0.000249922	0.00689785
hsa-miR-890	4.63272	4.37088	4.14105	4.172	4.98938	5.3518	4.97228	4.96267	0.739872	4.74522	0.000272278	0.00727245
hsa-miR-543	5.48464	5.37035	5.76643	5.45985	6.21077	6.12119	6.21641	6.17455	0.660411	5.8426	0.000317425	0.00821337
hsa-miR-1244	4.80114	4.83625	4.81531	4.65505	5.84306	5.18629	5.38787	5.51319	0.705662	5.08334	0.000440419	0.0106647
hsa-miR-548j-5p	3.96272	4.43795	4.21096	4.09844	5.10136	4.8412	5.15312	4.65226	0.759466	4.54034	0.000450803	0.0106647
hsa-miR-574-3p	5.71302	5.65036	5.56761	5.62613	6.48301	6.23153	6.29553	6.02209	0.618761	5.96587	0.000435249	0.0106647
hsa-miR-30e-5p	5.55703	5.65036	5.96156	5.99384	6.33051	6.69922	6.40663	6.37672	0.662575	6.06789	0.000480997	0.0110629
hsa-miR-532-5p	4.71939	4.06629	4.9024	4.54859	5.47846	5.63487	5.27526	5.39398	0.886478	4.9832	0.000503638	0.0112706
hsa-miR-183-5p	7.12142	7.30855	7.30992	7.49362	8.05718	8.08218	7.95606	7.6882	0.637532	7.58782	0.000576733	0.0125667
hsa-miR-1193	4.28035	4.37088	4.27763	4.09844	5.51936	4.9485	5.01966	4.65226	0.778121	4.63255	0.000633815	0.0127591
hsa-miR-203a-5p	4.95195	4.88514	5.33694	5.27189	6.0526	5.66665	5.58972	5.88144	0.686126	5.48523	0.00060626	0.0127591
hsa-miR-342-3p	6.94381	6.86032	6.6052	6.47278	7.54592	7.32506	7.48506	7.25853	0.683115	6.9683	0.000632288	0.0127591
hsa-miR-770-5p	4.58735	4.43795	5.02391	4.37255	5.51936	5.31218	5.27526	5.07027	0.688827	4.86512	0.000678022	0.0127591
hsa-miR-186-5p	6.01666	6.40402	6.3503	6.26994	6.83044	7.0029	7.04435	6.82374	0.665128	6.49668	0.000701143	0.012901
hsa-miR-4524a-5p	3.8131	3.97891	3.90837	4.09844	4.98938	4.89585	4.45677	4.58128	0.781113	4.32098	0.000761145	0.0137006
hsa-miR-584-3p	5.5333	5.59266	5.74302	5.65207	6.3533	6.14394	6.06656	6.41805	0.6152	5.96307	0.000858649	0.0148117
hsa-miR-221-5p	4.442	4.78566	4.72262	4.30875	5.51936	5.78719	5.55798	5.07027	0.918942	4.91373	0.000984765	0.0163077
hsa-miR-10b-5p	5.60334	5.02257	5.27301	5.39988	6.18558	6.0017	5.68096	5.99503	0.641117	5.65838	0.00103157	0.0164258
hsa-miR-630	5.35528	5.02257	5.30533	4.93411	6.13385	6.44813	5.76676	5.99503	0.931623	5.50107	0.00102011	0.0164258
hsa-miR-1915-3p	4.09827	4.14867	4.14105	4.24199	5.20527	4.7844	4.45677	4.90571	0.68054	4.52535	0.00112956	0.0170051
hsa-miR-412-3p	4.67671	4.83625	5.30533	5.0163	5.84306	5.75799	5.45834	5.47454	0.674833	5.36623	0.00112177	0.0170051
hsa-miR-433-3p	3.96272	3.97891	3.82165	3.18029	4.66425	4.46108	4.23385	4.58128	0.74922	4.06585	0.00112364	0.0170051
hsa-miR-1206	4.33627	5.10742	5.30533	5.23803	5.67224	6.12119	5.79427	5.62329	0.805986	5.36948	0.00118358	0.0171931
hsa-miR-323a-3p	4.4921	4.30055	4.51722	4.37255	5.15425	5.14176	4.76549	5.21798	0.649267	4.78549	0.00116697	0.0171931
hsa-miR-1266-5p	4.3901	4.37088	3.99017	4.172	4.92995	5.14176	4.38622	5.07027	0.651262	4.60206	0.00156588	0.0214902
hsa-miR-365a-3p+hsa-miR-365b-3p	8.07573	8.28134	8.19326	8.45319	8.68371	9.0069	8.9192	8.79075	0.599263	8.4923	0.00153721	0.0214902
hsa-miR-626	5.40843	5.10742	5.30533	5.59972	6.30734	5.95098	5.89933	5.88144	0.65455	5.64953	0.00163574	0.0214983
hsa-miR-145-5p	4.16155	3.56434	4.21096	3.66099	4.51046	4.59922	4.58828	4.42789	0.632004	4.24212	0.00180095	0.0232998
hsa-miR-181a-3p	6.22356	6.48553	6.42573	6.18365	7.201	7.14503	6.69629	6.77686	0.625174	6.62674	0.00206846	0.0258996
hsa-miR-610	3.73204	3.43898	4.14105	3.939	4.98938	5.04836	4.45677	4.42789	0.91783	4.24749	0.00209064	0.0258996
hsa-miR-101-3p	4.03208	3.78646	4.21096	4.02092	4.86797	4.38671	4.52403	4.65226	0.595136	4.26904	0.00227392	0.027076
hsa-miR-1304-5p	4.28035	4.78566	4.67395	4.6028	5.34832	5.09582	5.01966	5.39398	0.628756	4.83882	0.00228904	0.027076
hsa-miR-181c-5p	4.76084	4.43795	4.57137	4.97579	5.59783	5.72818	5.19499	5.43482	0.802464	4.95101	0.00256531	0.0295011
hsa-miR-193b-3p	4.58735	4.5634	4.9024	4.37255	5.70806	5.27142	5.15312	4.90571	0.653152	4.9017	0.00272535	0.0309121
hsa-miR-1276	4.54051	3.67967	3.82165	3.939	4.92995	4.46108	4.76549	4.8464	0.755522	4.41278	0.00298971	0.0328056
hsa-miR-1286	4.87851	4.43795	4.94405	4.84695	5.77714	5.18629	5.31379	5.51319	0.670732	5.04822	0.00297368	0.0328056
hsa-miR-495-3p	4.67671	5.40428	5.23995	5.54539	6.10727	5.78719	5.73873	5.88144	0.662074	5.57832	0.00301114	0.0328056
hsa-miR-96-5p	6.4809	6.63592	6.82175	6.85426	7.16279	7.32506	7.32455	7.35743	0.594252	6.95172	0.00329922	0.0354773
hsa-miR-1908-3p	3.64615	4.78566	4.14105	4.37255	5.25455	5.14176	4.76549	4.90571	0.780527	4.45373	0.00344782	0.0361367
hsa-miR-377-3p	4.28035	3.97891	3.99017	4.37255	5.30219	4.7844	4.58828	5.01748	0.767593	4.53062	0.00350956	0.036324
hsa-miR-152-3p	3.73204	4.50204	4.27763	4.30875	5.04646	4.66362	4.9233	4.78455	0.649367	4.50296	0.00377182	0.0365149
hsa-miR-4532	5.5333	5.22601	5.33694	5.20336	6.21077	5.69774	6.08895	5.8211	0.629738	5.5692	0.00411201	0.0379376
hsa-miR-568	4.63272	4.62225	4.72262	4.30875	5.30219	5.46456	4.9233	4.96267	0.591596	4.78321	0.00412365	0.0379376
hsa-miR-1305	5.15217	5.33559	5.74302	4.75419	5.81047	5.97656	5.71013	6.02209	0.633569	5.53027	0.00450562	0.0405506
hsa-miR-483-5p	4.3901	4.5634	4.34136	3.939	5.15425	5.18629	4.45677	4.78455	0.586999	4.53914	0.00596015	0.0491898
hsa-miR-656-3p	4.9157	5.18755	5.27301	5.0163	5.96649	6.0017	5.68096	5.12121	0.594447	5.29168	0.00582284	0.0491898
