# Supplementary material for: Spatiotemporal Regulation of ΔNp63 by TGFβ-Regulated miRNAs Is Essential for Cancer Metastasis
Source: Oxford University Press journal article supplement (doi:10.1158/0008-5472.can-19-2733), 2020-04-20
Supplement: 00085472can192733-sup-228309_2_supp_6223173_q8lzx7.xlsx [file 00085472can192733-sup-228309_2_supp_6223173_q8lzx7.xlsx]

## Sheet: Sheet1
		TGFβ-induced miRNAs predicted bound to 3'UTRp63 by miRwalk
	1	hsa-miR-222-3p
	2	hsa-miR-181a-5p
	3	hsa-miR-190a-5p
	4	hsa-miR-30d-5p
	5	hsa-miR-21-5p
	6	hsa-miR-22-3p
	7	hsa-miR-29b-3p
	8	hsa-miR-30a-5p
	9	hsa-miR-146a-5p
	10	hsa-miR-31-5p
	11	hsa-miR-181b-5p
	12	hsa-miR-181d-5p
	13	hsa-miR-548d-5p
	14	hsa-miR-203a-3p
	15	hsa-miR-23b-3p
	16	hsa-miR-200a-3p
	17	hsa-miR-4516
	18	hsa-miR-182-5p
	19	hsa-miR-424-5p
	20	hsa-miR-574-5p
	21	hsa-miR-454-3p
	22	hsa-miR-503-5p
	23	hsa-miR-141-3p
	24	hsa-miR-26b-5p
	25	hsa-miR-575
	26	hsa-miR-890
	27	hsa-miR-543
	28	hsa-miR-1244
	29	hsa-miR-548j-5p
	30	hsa-miR-574-3p
	31	hsa-miR-30e-5p
	32	hsa-miR-532-5p
	33	hsa-miR-183-5p
	34	hsa-miR-1193
	35	hsa-miR-342-3p
	36	hsa-miR-770-5p
	37	hsa-miR-186-5p
	38	hsa-miR-584-3p
	39	hsa-miR-221-5p
	40	hsa-miR-10b-5p
	41	hsa-miR-630
	42	hsa-miR-1915-3p
	43	hsa-miR-412-3p
	44	hsa-miR-433-3p
	45	hsa-miR-1206
	46	hsa-miR-323a-3p
	47	hsa-miR-1266-5p
	48	hsa-miR-365b-3p
	49	hsa-miR-365a-3p
	50	hsa-miR-145-5p
	51	hsa-miR-610
	52	hsa-miR-101-3p
	53	hsa-miR-1304-5p
	54	hsa-miR-181c-5p
	55	hsa-miR-193b-3p
	56	hsa-miR-1276
	57	hsa-miR-1286
	58	hsa-miR-495-3p
	59	hsa-miR-377-3p
	60	hsa-miR-4532
	61	hsa-miR-568
	62	hsa-miR-1305
	63	hsa-miR-483-5p
	64	hsa-miR-656-3p
