# Supplementary material for: Spatiotemporal Regulation of ΔNp63 by TGFβ-Regulated miRNAs Is Essential for Cancer Metastasis
Source: Oxford University Press journal article supplement (doi:10.1158/0008-5472.can-19-2733), 2020-04-20
Supplement: 00085472can192733-sup-228309_2_supp_6223174_q8lzl7.xlsx [file 00085472can192733-sup-228309_2_supp_6223174_q8lzl7.xlsx]

## Sheet: PCA scores
n	246			n	196			n	672			n	131
Pearson	0.222181			Pearson	-0.59277			Pearson	-0.612021			Pearson	-0.151469
P-value	0.000446398			P-value	5.54543e-20			P-value	2.63522e-70			P-value	0.0841663
Sample	C1 TGFB-EMT	C1 DNp63		Sample	C2 TGFB-EMT	C2 DNp63		Sample	C3 TGFB-EMT	C3 DNp63		Sample	C4 TGFB-EMT	C4 Dnp63
TCGA-05-4244-01A-01R-1107-07	-0.358453	0.0188		TCGA-18-3406-01A-01R-0980-07	-1.60266	-1.08551		TCGA-A1-A0SD-01A-11R-A115-07	3.47235	-1.87143		TCGA-A1-A0SB-01A-11R-A144-07	3.63847	0.393927
TCGA-05-4249-01A-01R-1107-07	-0.826299	-3.13369		TCGA-18-3407-01A-01R-0980-07	1.21469	-0.0623842		TCGA-A1-A0SE-01A-11R-A084-07	2.24256	-0.938402		TCGA-A1-A0SO-01A-22R-A084-07	-4.9342	2.80167
TCGA-05-4250-01A-01R-1107-07	5.47659	4.1578		TCGA-18-3408-01A-01R-0980-07	-9.01886	4.69855		TCGA-A1-A0SF-01A-11R-A144-07	-0.0349413	-2.03874		TCGA-A1-A0SP-01A-11R-A084-07	0.268804	0.645459
TCGA-05-4382-01A-01R-1206-07	6.70369	1.42712		TCGA-18-3410-01A-01R-0980-07	-1.55398	-1.88714		TCGA-A1-A0SG-01A-11R-A144-07	1.39986	-1.70499		TCGA-A2-A04P-01A-31R-A034-07	0.497935	-3.51885
TCGA-05-4384-01A-01R-1755-07	-1.58853	-4.30209		TCGA-18-3411-01A-01R-0980-07	-4.85491	1.95931		TCGA-A1-A0SH-01A-11R-A084-07	9.60446	-2.33564		TCGA-A2-A04Q-01A-21R-A034-07	0.363844	-4.81011
TCGA-05-4389-01A-01R-1206-07	-4.60184	0.771732		TCGA-18-3412-01A-01R-0980-07	-5.26451	1.78201		TCGA-A1-A0SI-01A-11R-A144-07	7.64369	-1.46011		TCGA-A2-A04T-01A-21R-A034-07	-1.58726	0.472122
TCGA-05-4390-01A-02R-1755-07	-0.299513	0.63586		TCGA-18-3414-01A-01R-0980-07	0.671542	-2.45982		TCGA-A1-A0SJ-01A-11R-A084-07	0.882968	-0.164872		TCGA-A2-A04U-01A-11R-A115-07	-2.58359	0.768075
TCGA-05-4395-01A-01R-1206-07	0.608676	6.95061		TCGA-18-3415-01A-01R-0980-07	-1.34882	1.26175		TCGA-A1-A0SM-01A-11R-A084-07	5.31363	0.811303		TCGA-A2-A0CM-01A-31R-A034-07	1.27485	-0.830839
TCGA-05-4396-01A-21R-1858-07	-5.52043	-1.11549		TCGA-18-3416-01A-01R-0980-07	-9.02779	0.22946		TCGA-A1-A0SN-01A-11R-A144-07	3.03136	-0.18448		TCGA-A2-A0D0-01A-11R-A00Z-07	-3.79026	-2.0339
TCGA-05-4397-01A-01R-1206-07	-2.86581	-0.470712		TCGA-18-3417-01A-01R-1443-07	6.11459	-0.827363		TCGA-A1-A0SQ-01A-21R-A144-07	-4.96776	1.64764		TCGA-A2-A0D2-01A-21R-A034-07	2.15406	-0.730238
TCGA-05-4398-01A-01R-1206-07	4.88283	1.24453		TCGA-18-3419-01A-01R-0980-07	-6.17943	1.31864		TCGA-A2-A04N-01A-11R-A115-07	3.31908	-2.3506		TCGA-A2-A0ST-01A-12R-A084-07	-0.824956	-4.96904
TCGA-05-4402-01A-01R-1206-07	2.09279	0.864755		TCGA-18-3421-01A-01R-0980-07	-7.01749	-0.28918		TCGA-A2-A04R-01A-41R-A109-07	-0.916044	3.45536		TCGA-A2-A0SX-01A-12R-A084-07	4.78791	-1.67127
TCGA-05-4403-01A-01R-1206-07	2.58817	-1.71344		TCGA-18-4083-01A-01R-1100-07	-1.4078	1.5057		TCGA-A2-A04V-01A-21R-A034-07	1.5066	-0.0712779		TCGA-A2-A0T0-01A-22R-A084-07	0.412262	0.446106
TCGA-05-4405-01A-21R-1858-07	4.46076	-1.3976		TCGA-18-4086-01A-01R-1100-07	-1.15557	1.27674		TCGA-A2-A04W-01A-31R-A115-07	7.65169	-0.0420256		TCGA-A2-A0T2-01A-11R-A084-07	1.41226	-1.73781
TCGA-05-4410-01A-21R-1858-07	-3.07825	-0.00641173		TCGA-18-4721-01A-01R-1443-07	-3.90325	1.69871		TCGA-A2-A04X-01A-21R-A034-07	-4.20195	-0.333005		TCGA-A2-A0YE-01A-11R-A109-07	1.86987	0.25387
TCGA-05-4415-01A-22R-1858-07	-1.73397	8.52516		TCGA-18-5592-01A-01R-1635-07	-1.6203	3.15425		TCGA-A2-A04Y-01A-21R-A034-07	-2.87835	-1.97489		TCGA-A2-A0YJ-01A-11R-A109-07	0.15214	5.37414
TCGA-05-4417-01A-22R-1858-07	3.24718	-0.468693		TCGA-21-1071-01A-01R-0692-07	-0.705665	2.14313		TCGA-A2-A0CL-01A-11R-A115-07	3.35417	-1.67846		TCGA-A2-A0YM-01A-11R-A109-07	2.40505	2.14459
TCGA-05-4418-01A-01R-1206-07	-0.37158	4.60252		TCGA-21-1072-01A-01R-0692-07	-2.34955	4.9173		TCGA-A2-A0CP-01A-11R-A034-07	7.58085	-5.43634		TCGA-A2-A1G1-01A-21R-A13Q-07	3.23007	4.44988
TCGA-05-4420-01A-01R-1206-07	-2.88802	1.59174		TCGA-21-1075-01A-01R-0692-07	-9.81627	7.50728		TCGA-A2-A0CQ-01A-21R-A034-07	-3.51682	-2.08779		TCGA-A2-A25F-01A-11R-A169-07	3.44898	-4.17972
TCGA-05-4422-01A-01R-1206-07	-7.30636	-3.43663		TCGA-21-1076-01A-01R-0692-07	3.34257	-3.91467		TCGA-A2-A0CS-01A-11R-A115-07	1.92893	-1.70841		TCGA-A7-A0CE-01A-11R-A00Z-07	-1.34283	0.152444
TCGA-05-4424-01A-22R-1858-07	0.678825	1.20056		TCGA-21-1079-01A-01R-0692-07	9.91958	1.32174		TCGA-A2-A0CT-01A-31R-A056-07	-6.07423	3.18728		TCGA-A7-A0DA-01A-31R-A115-07	6.77916	0.227027
TCGA-05-4425-01A-01R-1755-07	1.48094	-1.23738		TCGA-21-1080-01A-01R-0692-07	-4.57747	0.977682		TCGA-A2-A0CU-01A-12R-A034-07	-1.63962	1.53953		TCGA-A7-A13D-01A-13R-A12P-07	5.9974	0.607939
TCGA-05-4426-01A-01R-1206-07	2.78856	-2.1423		TCGA-21-1081-01A-01R-0692-07	3.58663	1.67679		TCGA-A2-A0CV-01A-31R-A115-07	4.07893	-4.81255		TCGA-A7-A13E-01A-11R-A12P-07	-1.28218	2.6338
TCGA-05-4427-01A-21R-1858-07	0.778439	1.41975		TCGA-21-1082-01A-01R-0692-07	0.284764	-1.82593		TCGA-A2-A0CW-01A-21R-A115-07	-5.65128	1.85655		TCGA-A7-A26F-01A-21R-A169-07	3.699	1.49604
TCGA-05-4430-01A-02R-1206-07	5.26516	-1.80395		TCGA-21-5782-01A-01R-1635-07	5.45666	-1.43042		TCGA-A2-A0CX-01A-21R-A00Z-07	2.39802	0.995021		TCGA-A7-A26G-01A-21R-A169-07	4.8214	-1.43235
TCGA-05-4432-01A-01R-1206-07	-0.046948	0.771361		TCGA-21-5784-01A-01R-1635-07	0.474689	-5.05546		TCGA-A2-A0CZ-01A-11R-A034-07	9.03378	-5.31653		TCGA-A7-A26I-01A-11R-A169-07	4.61812	2.01997
TCGA-05-4433-01A-22R-1858-07	-1.57509	0.0239398		TCGA-21-5786-01A-01R-1635-07	4.95137	-0.446922		TCGA-A2-A0D1-01A-11R-A034-07	-0.986253	3.46265		TCGA-A8-A07C-01A-11R-A034-07	-5.11986	2.57082
TCGA-05-4434-01A-01R-1206-07	6.34097	0.79589		TCGA-22-0940-01A-01R-0692-07	2.23705	-4.99389		TCGA-A2-A0D3-01A-11R-A115-07	-5.32411	-1.02318		TCGA-A8-A07O-01A-11R-A00Z-07	-2.48686	2.10053
TCGA-05-5423-01A-01R-1628-07	-4.97121	-4.39613		TCGA-22-0944-01A-01R-0692-07	-0.0172421	3.95665		TCGA-A2-A0D4-01A-11R-A00Z-07	-6.50641	3.72622		TCGA-A8-A07R-01A-21R-A034-07	-2.59878	3.50675
TCGA-05-5425-01A-02R-1628-07	-1.59556	0.81004		TCGA-22-1002-01A-01R-0692-07	3.22752	-5.0864		TCGA-A2-A0EM-01A-11R-A034-07	0.749305	-1.90462		TCGA-A8-A07U-01A-11R-A034-07	0.0679223	-4.1196
TCGA-05-5428-01A-01R-1628-07	-4.93262	1.82499		TCGA-22-1011-01A-01R-0692-07	1.03059	-2.05142		TCGA-A2-A0EN-01A-13R-A084-07	6.9454	-5.54692		TCGA-A8-A08R-01A-11R-A034-07	2.56066	1.93541
TCGA-05-5429-01A-01R-1628-07	0.0132309	2.05403		TCGA-22-1012-01A-01R-0692-07	0.185336	2.35465		TCGA-A2-A0EO-01A-11R-A034-07	5.40725	-2.98563		TCGA-AC-A2BK-01A-11R-A21T-07	-1.48776	2.35103
TCGA-05-5715-01A-01R-1628-07	-0.0912542	-0.683103		TCGA-22-1016-01A-01R-0692-07	4.27066	-5.5122		TCGA-A2-A0EQ-01A-11R-A034-07	-2.95954	-0.586246		TCGA-AN-A04D-01A-21R-A034-07	-6.06778	1.71383
TCGA-35-3615-01A-01R-0946-07	-7.12529	-4.13381		TCGA-22-4591-01A-01R-1201-07	-7.71586	2.48216		TCGA-A2-A0ER-01A-21R-A034-07	-6.3442	2.009		TCGA-AN-A0AL-01A-11R-A00Z-07	3.29576	-1.71689
TCGA-35-4122-01A-01R-1107-07	1.37118	2.11358		TCGA-22-4593-01A-21R-1820-07	4.87671	-0.0405475		TCGA-A2-A0ES-01A-11R-A115-07	3.92182	-3.41555		TCGA-AN-A0AT-01A-11R-A034-07	-0.938166	2.1829
TCGA-35-4123-01A-01R-1107-07	3.95882	3.74106		TCGA-22-4595-01A-01R-1201-07	3.20444	1.3605		TCGA-A2-A0ET-01A-31R-A034-07	-12.8668	0.989708		TCGA-AN-A0FJ-01A-11R-A00Z-07	0.717492	2.62934
TCGA-38-4625-01A-01R-1206-07	-0.621148	2.81406		TCGA-22-4599-01A-01R-1443-07	-5.23727	-0.138302		TCGA-A2-A0EU-01A-22R-A056-07	-2.34397	2.2839		TCGA-AN-A0FL-01A-11R-A034-07	-6.17055	-1.01727
TCGA-38-4626-01A-01R-1206-07	3.32584	-4.06896		TCGA-22-4601-01A-01R-1443-07	-2.51824	0.500985		TCGA-A2-A0EV-01A-11R-A034-07	1.4951	0.726911		TCGA-AN-A0FX-01A-11R-A034-07	5.33401	-0.0471503
TCGA-38-4627-01A-01R-1206-07	9.24146	-2.03936		TCGA-22-4604-01A-01R-1201-07	4.27151	-0.931839		TCGA-A2-A0EW-01A-21R-A115-07	4.62691	-4.55811		TCGA-AN-A0G0-01A-11R-A034-07	-1.8443	2.71364
TCGA-38-4628-01A-01R-1206-07	-1.36287	-1.54075		TCGA-22-4605-01A-21R-2125-07	3.50265	-1.37023		TCGA-A2-A0EX-01A-21R-A034-07	1.97512	-2.77817		TCGA-AN-A0XU-01A-11R-A109-07	0.311406	2.25005
TCGA-38-4631-01A-01R-1755-07	-0.664811	5.43664		TCGA-22-4607-01A-01R-1201-07	0.225991	-1.80023		TCGA-A2-A0EY-01A-11R-A034-07	-1.2465	-0.769216		TCGA-AO-A03U-01B-21R-A10J-07	5.54162	-5.41781
TCGA-38-4632-01A-01R-1755-07	0.00824381	0.674205		TCGA-22-4613-01A-01R-1443-07	-4.73282	1.07047		TCGA-A2-A0SU-01A-11R-A084-07	-1.23975	-1.05754		TCGA-AO-A0J4-01A-11R-A034-07	5.15803	1.16862
TCGA-38-6178-01A-11R-1755-07	2.70441	-0.217315		TCGA-22-5471-01A-01R-1635-07	-0.420403	-0.590891		TCGA-A2-A0SV-01A-11R-A084-07	3.7926	1.39321		TCGA-AO-A0J6-01A-11R-A034-07	-3.07589	-1.73751
TCGA-44-2655-01A-01R-0946-07	-3.12991	-2.5495		TCGA-22-5472-01A-01R-1635-07	0.102251	-3.91035		TCGA-A2-A0SW-01A-11R-A084-07	0.754422	0.787356		TCGA-AO-A0JL-01A-11R-A056-07	0.879664	-1.61817
TCGA-44-2656-01A-02R-0946-07	-1.43084	-0.609396		TCGA-22-5473-01A-01R-1635-07	-1.34571	2.49827		TCGA-A2-A0SY-01A-31R-A084-07	1.84442	-2.3173		TCGA-AO-A124-01A-11R-A10J-07	-2.83291	2.95581
TCGA-44-2657-01A-01R-1107-07	-0.356983	-2.96506		TCGA-22-5474-01A-01R-1635-07	-1.66779	-1.63248		TCGA-A2-A0T1-01A-21R-A084-07	5.82641	-2.62692		TCGA-AO-A128-01A-11R-A10J-07	-1.95277	-7.18233
TCGA-44-2662-01A-01R-0946-07	4.22971	3.13387		TCGA-22-5477-01A-01R-1635-07	-6.42142	4.5131		TCGA-A2-A0T3-01A-21R-A115-07	-0.305578	1.10727		TCGA-AO-A129-01A-21R-A10J-07	0.82433	-1.93755
TCGA-44-2665-01A-01R-0946-07	7.46847	-2.46428		TCGA-22-5479-01A-31R-1949-07	-1.64098	1.05796		TCGA-A2-A0T4-01A-31R-A084-07	3.57254	-2.05957		TCGA-AO-A12F-01A-11R-A115-07	1.8028	-0.71116
TCGA-44-2666-01A-01R-0946-07	-2.24661	-1.56278		TCGA-22-5480-01A-01R-1635-07	1.03814	-3.48754		TCGA-A2-A0T5-01A-21R-A084-07	2.82393	-0.624359		TCGA-AO-A1KR-01A-12R-A144-07	-5.91298	-2.5461
TCGA-44-2668-01A-01R-0946-07	9.233	5.23114		TCGA-22-5482-01A-01R-1635-07	4.13173	1.78351		TCGA-A2-A0T6-01A-11R-A084-07	6.24494	-3.43154		TCGA-AQ-A04J-01A-02R-A034-07	2.61502	-1.83035
TCGA-44-3396-01A-01R-1206-07	4.98593	-0.852668		TCGA-22-5485-01A-01R-1635-07	-4.22965	2.18487		TCGA-A2-A0T7-01A-21R-A084-07	6.08115	-0.362515		TCGA-AR-A0TP-01A-11R-A084-07	2.77672	3.0906
TCGA-44-3398-01A-01R-1107-07	4.15735	-2.00013		TCGA-22-5489-01A-01R-1635-07	4.81228	-4.45712		TCGA-A2-A0YC-01A-11R-A109-07	-1.07856	-0.667586		TCGA-AR-A0TS-01A-11R-A115-07	3.37501	-0.240448
TCGA-44-3918-01A-01R-1107-07	1.82704	-0.0914566		TCGA-22-5491-01A-01R-1635-07	-8.96013	3.61968		TCGA-A2-A0YD-01A-11R-A109-07	8.29362	-3.26512		TCGA-AR-A0TU-01A-31R-A109-07	-9.27243	1.41342
TCGA-44-3919-01A-02R-1107-07	1.92145	-1.41793		TCGA-22-5492-01A-01R-1635-07	-1.50334	-3.34491		TCGA-A2-A0YF-01A-21R-A109-07	-6.29824	1.3718		TCGA-AR-A0U4-01A-11R-A109-07	0.174269	-2.10664
TCGA-44-4112-01A-01R-1107-07	1.96812	-0.481811		TCGA-33-4532-01A-01R-1201-07	-7.26972	4.25529		TCGA-A2-A0YG-01A-21R-A109-07	-3.73269	2.33415		TCGA-AR-A1AH-01A-11R-A12D-07	-3.31799	2.16845
TCGA-44-5644-01A-21R-2039-07	-3.05803	3.91126		TCGA-33-4538-01A-01R-1201-07	-4.38032	3.71974		TCGA-A2-A0YH-01A-11R-A109-07	-1.43845	1.29889		TCGA-AR-A1AI-01A-11R-A12P-07	-3.99926	0.521007
TCGA-44-5645-01A-01R-1628-07	-2.45663	-5.07803		TCGA-33-4547-01A-01R-1201-07	1.94099	-1.67654		TCGA-A2-A0YI-01A-31R-A10J-07	0.933685	-2.82922		TCGA-AR-A1AJ-01A-21R-A12P-07	0.366001	-3.65278
TCGA-44-6145-01A-11R-1755-07	2.4341	0.501619		TCGA-33-4582-01A-01R-1443-07	-7.74369	2.88272		TCGA-A2-A0YK-01A-22R-A109-07	3.56203	-4.51548		TCGA-AR-A1AQ-01A-11R-A12P-07	-1.51783	-1.77428
TCGA-44-6146-01A-11R-1755-07	-2.64556	0.0267904		TCGA-33-4583-01A-01R-1443-07	-9.03109	4.39841		TCGA-A2-A0YL-01A-21R-A109-07	3.67974	-2.23577		TCGA-AR-A1AR-01A-31R-A137-07	0.339755	-1.48866
TCGA-44-6148-01A-11R-1755-07	-0.609582	-3.47841		TCGA-33-4586-01A-01R-1443-07	-0.615703	4.21884		TCGA-A2-A0YT-01A-11R-A109-07	-5.39239	4.17329		TCGA-AR-A1AY-01A-21R-A12P-07	0.794788	3.19523
TCGA-44-6774-01A-21R-1858-07	9.8062	0.334191		TCGA-33-6738-01A-11R-1949-07	-5.76785	-2.33265		TCGA-A2-A1FV-01A-11R-A13Q-07	-5.87185	3.47191		TCGA-AR-A24Q-01A-12R-A169-07	4.74988	1.43917
TCGA-44-6775-01A-11R-1858-07	6.33105	0.0211374		TCGA-34-2596-01A-01R-0851-07	-0.165099	1.45416		TCGA-A2-A1FW-01A-11R-A13Q-07	-7.09805	4.86223		TCGA-AR-A251-01A-12R-A169-07	0.770024	3.17385
TCGA-44-6776-01A-11R-1858-07	-7.74405	-4.76634		TCGA-34-2600-01A-01R-0851-07	-2.47796	-0.543745		TCGA-A2-A1FX-01A-11R-A13Q-07	-3.01368	2.05904		TCGA-AR-A256-01A-11R-A169-07	-0.988865	2.87562
TCGA-44-6777-01A-11R-1858-07	6.3225	-2.0272		TCGA-34-2608-01A-02R-0851-07	5.9177	-3.8204		TCGA-A2-A1FZ-01A-51R-A14D-07	4.62088	-2.54005		TCGA-B6-A0I2-01A-11R-A034-07	-5.66734	-4.98431
TCGA-44-6778-01A-11R-1858-07	-0.598653	-0.751213		TCGA-34-5231-01A-21R-1820-07	-3.88422	3.34216		TCGA-A2-A1G0-01A-11R-A13Q-07	0.0582326	-1.29085		TCGA-B6-A0I6-01A-11R-A034-07	4.43446	-0.890978
TCGA-44-6779-01A-11R-1858-07	3.92763	4.66772		TCGA-34-5232-01A-21R-1820-07	-3.05541	-1.89261		TCGA-A2-A1G4-01A-11R-A13Q-07	-7.6308	2.7791		TCGA-B6-A0IJ-01A-11R-A034-07	-3.64006	-2.83617
TCGA-44-7659-01A-11R-2066-07	-4.60947	-4.43338		TCGA-34-5236-01A-21R-1820-07	7.58518	-0.209058		TCGA-A2-A259-01A-11R-A16F-07	2.10205	-1.79714		TCGA-B6-A0IQ-01A-11R-A034-07	-3.84505	-1.73025
TCGA-44-7661-01A-11R-2066-07	8.83768	2.91672		TCGA-34-5239-01A-21R-1820-07	4.81578	-4.62838		TCGA-A2-A25A-01A-12R-A16F-07	5.55843	-4.47258		TCGA-B6-A0RE-01A-11R-A056-07	1.92102	0.883963
TCGA-44-7662-01A-11R-2066-07	7.84544	3.02923		TCGA-34-5240-01A-01R-1443-07	-5.58923	3.26186		TCGA-A2-A25B-01A-11R-A169-07	-2.15887	5.75973		TCGA-B6-A0RT-01A-21R-A084-07	-0.0653158	-4.65481
TCGA-44-7667-01A-31R-2066-07	-4.80485	4.16306		TCGA-34-5241-01A-01R-1443-07	2.79306	-2.04731		TCGA-A2-A25C-01A-11R-A169-07	-0.851672	0.210853		TCGA-B6-A0RU-01A-11R-A084-07	0.251382	0.074099
TCGA-44-7669-01A-21R-2066-07	-2.50258	4.97574		TCGA-34-5927-01A-11R-1820-07	-3.58951	4.24457		TCGA-A2-A25D-01A-12R-A16F-07	-1.98705	-2.51193		TCGA-B6-A0WX-01A-11R-A109-07	6.58285	-1.16646
TCGA-44-7670-01A-11R-2066-07	2.07459	5.00431		TCGA-34-5928-01A-11R-1820-07	9.54902	-1.8906		TCGA-A2-A25E-01A-11R-A169-07	-4.14119	4.58297		TCGA-B6-A0X1-01A-11R-A109-07	-6.31134	0.114667
TCGA-44-7671-01A-11R-2066-07	0.0206049	-2.59383		TCGA-34-5929-01A-11R-1820-07	-1.01964	-0.289183		TCGA-A2-A3KC-01A-11R-A213-07	5.49083	-3.75859		TCGA-B6-A1KF-01A-11R-A13Q-07	-2.98092	0.444458
TCGA-44-7672-01A-11R-2066-07	6.21086	-0.584888		TCGA-34-7107-01A-11R-1949-07	3.16089	1.38594		TCGA-A2-A3KD-01A-12R-A213-07	-0.0653679	-0.883341		TCGA-BH-A0AV-01A-31R-A115-07	8.36297	-0.539398
TCGA-49-4486-01A-01R-1206-07	-12.6683	-4.12513		TCGA-37-3783-01A-01R-1201-07	-3.02178	-0.244156		TCGA-A7-A0CD-01A-11R-A00Z-07	-3.69033	1.35047		TCGA-BH-A0B3-01A-11R-A056-07	5.41278	-0.656596
TCGA-49-4487-01A-21R-1858-07	2.76149	0.113941		TCGA-37-3789-01A-01R-0980-07	2.11631	0.0167507		TCGA-A7-A0CG-01A-12R-A056-07	0.794909	-2.83055		TCGA-BH-A0BG-01A-11R-A115-07	0.089995	0.801012
TCGA-49-4488-01A-01R-1755-07	-2.8896	0.0429291		TCGA-37-4133-01A-01R-1100-07	-10.1117	1.1855		TCGA-A7-A0CH-01A-21R-A00Z-07	-0.881187	-0.0657183		TCGA-BH-A0BL-01A-11R-A115-07	7.47072	-2.23122
TCGA-49-4490-01A-21R-1858-07	3.83489	-0.68602		TCGA-39-5016-01A-01R-1443-07	-6.42151	0.850628		TCGA-A7-A0CJ-01A-21R-A00Z-07	-4.53001	3.32936		TCGA-BH-A0BW-01A-11R-A115-07	-0.546997	0.334957
TCGA-49-4494-01A-01R-1206-07	-0.243209	-0.730973		TCGA-39-5019-01A-01R-1820-07	2.50487	0.919308		TCGA-A7-A0D9-01A-31R-A056-07	-0.862759	0.9226		TCGA-BH-A0DL-01A-11R-A115-07	-1.43806	-0.628166
TCGA-49-4501-01A-01R-1206-07	-0.149366	-1.89449		TCGA-39-5021-01A-01R-1443-07	-2.2621	1.2827		TCGA-A7-A0DB-01A-11R-A00Z-07	0.859945	-2.24808		TCGA-BH-A0E0-01A-11R-A056-07	-5.91276	0.933048
TCGA-49-4505-01A-01R-1206-07	1.71862	-2.21518		TCGA-39-5024-01A-21R-1820-07	0.867426	-1.64483		TCGA-A7-A13F-01A-11R-A12P-07	-1.0242	1.21948		TCGA-BH-A0E6-01A-11R-A034-07	1.29836	-2.77034
TCGA-49-4506-01A-01R-1206-07	-5.50564	4.93891		TCGA-39-5027-01A-21R-1820-07	-5.68855	4.00173		TCGA-A7-A26E-01A-11R-A169-07	-1.00811	-0.253159		TCGA-BH-A0RX-01A-21R-A084-07	1.79581	-4.10065
TCGA-49-4507-01A-01R-1206-07	1.15167	3.00591		TCGA-39-5028-01A-01R-1443-07	3.49268	-2.40109		TCGA-A7-A26H-01A-11R-A169-07	2.22784	0.455287		TCGA-BH-A0WA-01A-11R-A109-07	3.93944	3.74053
TCGA-49-4510-01A-01R-1206-07	-1.29224	-7.26094		TCGA-39-5029-01A-01R-1443-07	4.12277	-2.39881		TCGA-A7-A26J-01A-11R-A169-07	0.415419	2.07269		TCGA-BH-A18G-01A-11R-A12D-07	-0.225618	-2.47766
TCGA-49-4512-01A-21R-1858-07	2.78954	-3.62228		TCGA-39-5030-01A-01R-1443-07	3.39113	-6.46636		TCGA-A7-A2KD-01A-31R-A21T-07	0.182638	0.167197		TCGA-BH-A18Q-01A-12R-A12D-07	-1.25725	-0.586908
TCGA-49-4514-01A-21R-1858-07	-5.40471	0.28484		TCGA-39-5031-01A-01R-1443-07	2.25593	-1.54497		TCGA-A7-A3IZ-01A-11R-A213-07	-6.26152	0.988899		TCGA-BH-A18T-01A-11R-A12D-07	-3.22143	4.76379
TCGA-49-6742-01A-11R-1858-07	-2.6523	2.43182		TCGA-39-5035-01A-01R-1443-07	-0.276646	-3.10038		TCGA-A7-A3J0-01A-11R-A213-07	-6.03451	-0.400075		TCGA-BH-A18V-01A-11R-A12D-07	2.4686	1.65627
TCGA-49-6743-01A-11R-1858-07	2.59042	3.77549		TCGA-39-5036-01A-01R-1443-07	-6.20631	0.706978		TCGA-A7-A3J1-01A-11R-A213-07	1.26785	-4.05554		TCGA-BH-A1F0-01A-11R-A137-07	2.16617	-2.58845
TCGA-49-6744-01A-11R-1858-07	3.5221	-2.55857		TCGA-39-5037-01A-01R-1443-07	-9.99788	5.74304		TCGA-A8-A06N-01A-11R-A00Z-07	-16.6154	6.82268		TCGA-BH-A1F6-01A-11R-A13Q-07	-0.626361	0.136244
TCGA-49-6745-01A-11R-1858-07	4.21802	2.83266		TCGA-39-5039-01A-01R-1443-07	4.35813	-5.56366		TCGA-A8-A06O-01A-11R-A00Z-07	-2.34899	2.57469		TCGA-BH-A1FC-01A-11R-A13Q-07	-2.58391	0.425804
TCGA-49-6761-01A-31R-1949-07	3.07365	2.53631		TCGA-43-3394-01A-01R-0980-07	-2.53337	3.85912		TCGA-A8-A06P-01A-11R-A00Z-07	4.77995	-2.32286		TCGA-C8-A12K-01A-21R-A115-07	-2.34122	-2.72596
TCGA-49-6767-01A-11R-1858-07	4.11486	4.17769		TCGA-43-3920-01A-01R-0980-07	-1.29065	-0.0341487		TCGA-A8-A06Q-01A-11R-A034-07	-12.5558	6.3242		TCGA-C8-A12V-01A-11R-A115-07	0.0938542	-4.65483
TCGA-50-5044-01A-21R-1858-07	12.04	0.296136		TCGA-43-6647-01A-11R-1820-07	11.4049	-4.25593		TCGA-A8-A06R-01A-11R-A00Z-07	3.09119	-0.564528		TCGA-C8-A1HJ-01A-11R-A13Q-07	-2.81039	3.90915
TCGA-50-5049-01A-01R-1628-07	3.01111	-1.68164		TCGA-43-6770-01A-11R-1820-07	3.83503	1.91555		TCGA-A8-A06T-01A-11R-A00Z-07	-6.4396	2.33744		TCGA-C8-A27B-01A-11R-A169-07	-3.71352	1.12145
TCGA-50-5051-01A-21R-1858-07	-1.79943	-3.08862		TCGA-43-6771-01A-11R-1820-07	8.91614	-1.08169		TCGA-A8-A06U-01A-11R-A00Z-07	-3.32909	2.04471		TCGA-D8-A142-01A-11R-A115-07	7.51979	-0.588728
TCGA-50-5066-01A-01R-1628-07	0.241444	0.949404		TCGA-46-3765-01A-01R-0980-07	-2.3775	0.167621		TCGA-A8-A06X-01A-21R-A00Z-07	-2.74598	3.08495		TCGA-D8-A147-01A-11R-A115-07	1.12983	3.28695
TCGA-50-5068-01A-01R-1628-07	-5.73783	-2.6385		TCGA-46-3766-01A-01R-0980-07	5.1994	-6.78224		TCGA-A8-A06Y-01A-21R-A00Z-07	-5.77519	-0.173843		TCGA-D8-A1JL-01A-11R-A13Q-07	2.22211	-1.10493
TCGA-50-5072-01A-21R-1858-07	1.92522	6.73105		TCGA-46-3767-01A-01R-0980-07	7.01903	-4.68094		TCGA-A8-A06Z-01A-11R-A00Z-07	-10.3849	4.76314		TCGA-D8-A1JM-01A-11R-A13Q-07	-7.74563	3.81542
TCGA-50-5932-01A-11R-1755-07	-5.75515	-0.906193		TCGA-46-3768-01A-01R-0980-07	-6.29035	3.18407		TCGA-A8-A075-01A-11R-A084-07	2.46572	1.96213		TCGA-D8-A1XK-01A-21R-A14M-07	-3.58872	1.4952
TCGA-50-5933-01A-11R-1755-07	6.91486	4.82466		TCGA-46-6025-01A-11R-1820-07	2.2926	2.18139		TCGA-A8-A076-01A-21R-A00Z-07	1.2772	1.34449		TCGA-D8-A1XQ-01A-11R-A14M-07	2.41342	0.168419
TCGA-50-5935-01A-11R-1755-07	-1.69126	-2.91527		TCGA-46-6026-01A-11R-1820-07	-1.35452	1.5793		TCGA-A8-A079-01A-21R-A00Z-07	-3.87298	3.23204		TCGA-D8-A1XW-01A-11R-A14M-07	1.60462	0.256337
TCGA-50-5936-01A-11R-1628-07	2.33517	3.18212		TCGA-51-4079-01A-01R-1100-07	-0.212637	1.62191		TCGA-A8-A07B-01A-11R-A00Z-07	-1.65552	2.52302		TCGA-D8-A27H-01A-11R-A16F-07	8.54151	1.84151
TCGA-50-5939-01A-11R-1628-07	5.79733	2.7197		TCGA-51-4080-01A-01R-1100-07	-9.0826	5.33197		TCGA-A8-A07E-01A-11R-A034-07	5.44754	-1.12674		TCGA-D8-A27M-01A-11R-A16F-07	5.43614	-0.891879
TCGA-50-5941-01A-11R-1755-07	1.10468	0.461267		TCGA-51-4081-01A-01R-1100-07	1.49628	3.59116		TCGA-A8-A07F-01A-11R-A00Z-07	-1.05206	0.915185		TCGA-E2-A14N-01A-31R-A137-07	-7.17168	2.88036
TCGA-50-5942-01A-21R-1755-07	-1.83409	-5.44511		TCGA-51-6867-01A-11R-2045-07	-0.451268	2.51025		TCGA-A8-A07G-01A-11R-A034-07	4.97326	-0.125579		TCGA-E2-A14R-01A-11R-A115-07	-4.09795	-0.667353
TCGA-50-5944-01A-11R-1755-07	1.31041	-2.45713		TCGA-56-1622-01A-01R-0692-07	-0.301203	3.3944		TCGA-A8-A07I-01A-11R-A00Z-07	3.04843	1.29655		TCGA-E2-A14X-01A-11R-A115-07	-1.09863	0.782788
TCGA-50-5946-01A-11R-1755-07	-1.29448	3.7939		TCGA-56-5897-01A-11R-1635-07	6.86184	-2.80924		TCGA-A8-A07J-01A-11R-A00Z-07	3.98379	-3.75918		TCGA-E2-A14Y-01A-21R-A12D-07	-2.12462	5.42361
TCGA-50-6590-01A-12R-1858-07	7.35826	4.16017		TCGA-56-5898-01A-11R-1635-07	4.49764	-1.25022		TCGA-A8-A07L-01A-11R-A00Z-07	-2.09892	3.53356		TCGA-E2-A150-01A-11R-A12D-07	2.62665	-0.173024
TCGA-50-6592-01A-11R-1755-07	3.5511	5.83265		TCGA-56-6545-01A-11R-1820-07	10.1396	-3.45104		TCGA-A8-A07P-01A-11R-A00Z-07	-4.27778	1.55272		TCGA-E2-A158-01A-11R-A12D-07	-4.18202	1.83692
TCGA-50-6593-01A-11R-1755-07	4.75402	0.636875		TCGA-56-7221-01A-11R-2045-07	-3.74207	3.9854		TCGA-A8-A07S-01A-11R-A034-07	-2.72892	0.61995		TCGA-E2-A159-01A-11R-A115-07	0.742369	-0.845469
TCGA-50-6594-01A-11R-1755-07	1.63304	3.90927		TCGA-56-7222-01A-11R-2045-07	0.185827	3.71838		TCGA-A8-A07W-01A-11R-A00Z-07	-0.390589	4.49149		TCGA-E2-A1AZ-01A-11R-A12P-07	2.06724	-0.194197
TCGA-50-6597-01A-11R-1858-07	-5.52973	-4.1515		TCGA-60-2698-01A-01R-0851-07	3.54776	-1.9774		TCGA-A8-A081-01A-11R-A00Z-07	-9.38062	2.16047		TCGA-E2-A1II-01A-11R-A144-07	-6.48859	-1.85589
TCGA-50-6673-01A-11R-1949-07	2.52329	2.09713		TCGA-60-2703-01A-11R-2045-07	5.06963	1.12179		TCGA-A8-A082-01A-11R-A00Z-07	-0.450403	0.183705		TCGA-E2-A1LG-01A-21R-A14M-07	-7.06342	2.84003
TCGA-50-7109-01A-11R-2039-07	-3.00963	-0.369886		TCGA-60-2704-01A-11R-2045-07	5.74445	-1.95408		TCGA-A8-A083-01A-21R-A00Z-07	-9.30781	-2.69595		TCGA-E2-A1LH-01A-11R-A14D-07	1.66085	-3.37997
TCGA-53-7626-01A-12R-2066-07	1.5731	-2.0781		TCGA-60-2707-01A-01R-0851-07	8.55506	-2.3914		TCGA-A8-A085-01A-11R-A00Z-07	-0.979872	1.95396		TCGA-E2-A1LI-01A-12R-A157-07	-2.51811	0.636936
TCGA-53-7813-01A-11R-2170-07	-7.71136	0.795107		TCGA-60-2708-01A-01R-0851-07	9.61665	0.281263		TCGA-A8-A086-01A-11R-A00Z-07	2.36197	1.73487		TCGA-E2-A1LK-01A-21R-A14D-07	-2.80494	3.66606
TCGA-55-1592-01A-01R-0946-07	-2.61086	0.245094		TCGA-60-2709-01A-21R-1820-07	4.91181	-4.23647		TCGA-A8-A08B-01A-11R-A00Z-07	-5.58098	2.22732		TCGA-E2-A1LS-01A-12R-A157-07	-4.96566	0.331257
TCGA-55-1594-01A-01R-0946-07	-2.38919	2.48215		TCGA-60-2710-01A-01R-0851-07	1.21407	-0.131022		TCGA-A8-A08G-01A-11R-A00Z-07	-1.94383	2.08396		TCGA-E9-A1N8-01A-11R-A144-07	-0.76273	2.73385
TCGA-55-1595-01A-01R-0946-07	0.431709	-0.955185		TCGA-60-2711-01A-01R-0851-07	-6.44279	1.99143		TCGA-A8-A08H-01A-21R-A00Z-07	8.01083	-5.03027		TCGA-E9-A1ND-01A-11R-A144-07	0.0398599	-3.31764
TCGA-55-1596-01A-01R-0946-07	-6.77515	3.1658		TCGA-60-2713-01A-01R-0851-07	3.61014	-1.51304		TCGA-A8-A08I-01A-11R-A00Z-07	-4.72947	-0.479584		TCGA-E9-A22G-01A-11R-A157-07	-7.30164	2.11166
TCGA-55-5899-01A-11R-1628-07	-0.978777	1.12843		TCGA-60-2716-01A-01R-0851-07	-6.60095	-1.10787		TCGA-A8-A08J-01A-11R-A00Z-07	0.65685	2.66195		TCGA-E9-A243-01A-21R-A169-07	-1.85178	-2.26245
TCGA-55-6543-01A-11R-1755-07	0.24533	-3.71108		TCGA-60-2719-01A-01R-0851-07	-5.13677	3.01059		TCGA-A8-A08L-01A-11R-A00Z-07	-0.924842	1.21034		TCGA-E9-A244-01A-11R-A169-07	1.8506	3.21529
TCGA-55-6642-01A-11R-1858-07	4.2727	0.566691		TCGA-60-2720-01A-01R-0851-07	6.81924	-5.92944		TCGA-A8-A08O-01A-21R-A056-07	1.89435	0.15242		TCGA-EW-A1OW-01A-21R-A144-07	4.0606	1.11753
TCGA-55-6712-01A-11R-1858-07	3.37944	2.45416		TCGA-60-2721-01A-01R-0851-07	-1.35807	-2.25107		TCGA-A8-A08P-01A-11R-A00Z-07	-0.051262	1.7906		TCGA-EW-A1P4-01A-21R-A144-07	3.16173	0.182631
TCGA-55-6969-01A-11R-1949-07	2.88836	1.21419		TCGA-60-2722-01A-01R-0851-07	-3.12041	5.30944		TCGA-A8-A08T-01A-21R-A00Z-07	-1.32897	0.661523		TCGA-EW-A1P7-01A-21R-A144-07	5.62847	-3.99663
TCGA-55-6970-01A-11R-1949-07	-2.85645	1.72843		TCGA-60-2723-01A-01R-0851-07	-1.19666	1.12631		TCGA-A8-A08X-01A-21R-A00Z-07	6.56799	-0.583855		TCGA-EW-A1P8-01A-11R-A144-07	1.77861	-2.65133
TCGA-55-6971-01A-11R-1949-07	2.05659	-1.8258		TCGA-60-2724-01A-01R-0851-07	5.17772	2.22244		TCGA-A8-A08Z-01A-21R-A00Z-07	6.556	-1.13282		TCGA-EW-A1PB-01A-11R-A144-07	-4.72914	-3.63004
TCGA-55-6978-01A-11R-1949-07	8.41138	3.00789		TCGA-60-2725-01A-01R-1201-07	2.39006	-3.77963		TCGA-A8-A090-01A-11R-A00Z-07	-1.12933	1.58617		TCGA-EW-A1PH-01A-11R-A14M-07	-0.383415	2.78906
TCGA-55-6979-01A-11R-1949-07	4.53842	-0.416445		TCGA-60-2726-01A-01R-0851-07	-2.37021	-1.80121		TCGA-A8-A091-01A-11R-A00Z-07	-2.60076	0.0386194		TCGA-GI-A2C9-01A-11R-A21T-07	1.47524	1.63195
TCGA-55-6981-01A-11R-1949-07	2.83846	2.04922		TCGA-63-5128-01A-01R-1443-07	0.795372	4.8613		TCGA-A8-A092-01A-11R-A00Z-07	-3.29378	3.17197		TCGA-GM-A2DF-01A-11R-A180-07	3.04791	-2.68025
TCGA-55-6982-01A-11R-1949-07	4.95066	2.05561		TCGA-63-5131-01A-01R-1443-07	-6.09474	1.66719		TCGA-A8-A093-01A-11R-A00Z-07	0.802946	-1.12877		TCGA-HN-A2NL-01A-11R-A18M-07	-6.68719	0.0648897
TCGA-55-7573-01A-11R-2039-07	-0.769685	-2.37954		TCGA-63-7020-01A-11R-1949-07	2.81249	-2.91061		TCGA-A8-A094-01A-11R-A00Z-07	-0.209444	0.742844
TCGA-55-7574-01A-11R-2039-07	4.9579	-2.47114		TCGA-63-7021-01A-11R-1949-07	1.72805	-0.816925		TCGA-A8-A095-01A-11R-A00Z-07	-0.351024	0.94931
TCGA-55-7728-01A-11R-2187-07	2.45538	-4.14585		TCGA-63-7022-01A-11R-1949-07	7.01017	-5.78178		TCGA-A8-A096-01A-11R-A00Z-07	4.15024	-2.3842
TCGA-55-7815-01A-11R-2170-07	-5.2904	3.7314		TCGA-63-7023-01A-11R-1949-07	-5.92803	4.38389		TCGA-A8-A097-01A-11R-A034-07	5.17787	0.383491
TCGA-55-7910-01A-11R-2170-07	-2.32974	1.02276		TCGA-66-2727-01A-01R-0980-07	-4.89718	0.948372		TCGA-A8-A099-01A-11R-A00Z-07	-4.12296	1.298
TCGA-55-7911-01A-11R-2170-07	-2.76865	-1.35624		TCGA-66-2734-01A-01R-0980-07	5.02206	-1.27731		TCGA-A8-A09A-01A-11R-A00Z-07	2.52718	0.483537
TCGA-64-1676-01A-01R-0946-07	-1.25941	-1.23691		TCGA-66-2737-01A-01R-0980-07	3.94446	-0.510082		TCGA-A8-A09B-01A-11R-A00Z-07	1.39728	-0.794826
TCGA-64-1677-01A-01R-0946-07	-4.82094	1.28026		TCGA-66-2742-01A-01R-0980-07	-0.164628	0.884799		TCGA-A8-A09C-01A-11R-A00Z-07	-1.80616	1.80926
TCGA-64-1678-01A-01R-0946-07	-8.19072	2.78775		TCGA-66-2744-01A-01R-0980-07	7.06737	-5.21688		TCGA-A8-A09D-01A-11R-A00Z-07	3.41893	-0.922591
TCGA-64-1680-01A-02R-0946-07	-7.12439	-4.18529		TCGA-66-2755-01A-01R-0851-07	1.10362	-3.78983		TCGA-A8-A09G-01A-21R-A00Z-07	-4.25854	1.03244
TCGA-64-1681-01A-11R-2066-07	0.0215698	-2.43008		TCGA-66-2758-01A-02R-0851-07	-4.8954	-0.774652		TCGA-A8-A09I-01A-22R-A034-07	-2.38935	2.67188
TCGA-64-5774-01A-01R-1628-07	-1.30325	2.14763		TCGA-66-2759-01A-01R-0851-07	-1.55899	0.737162		TCGA-A8-A09M-01A-11R-A00Z-07	-5.86754	1.53362
TCGA-64-5778-01A-01R-1628-07	-3.87643	-3.04701		TCGA-66-2763-01A-01R-0851-07	-4.25711	0.466594		TCGA-A8-A09N-01A-11R-A00Z-07	-3.91584	1.74398
TCGA-64-5779-01A-01R-1628-07	2.28333	1.37119		TCGA-66-2765-01A-01R-0851-07	5.6271	-2.8587		TCGA-A8-A09Q-01A-11R-A00Z-07	-1.87212	1.7873
TCGA-64-5781-01A-01R-1628-07	5.3892	2.49237		TCGA-66-2766-01A-01R-0851-07	-3.10386	0.915753		TCGA-A8-A09R-01A-11R-A00Z-07	2.8008	0.737303
TCGA-64-5815-01A-01R-1628-07	8.6329	-0.275298		TCGA-66-2767-01A-01R-0851-07	0.0392099	-4.53655		TCGA-A8-A09T-01A-11R-A00Z-07	-1.48909	-0.243549
TCGA-67-3771-01A-01R-0946-07	-1.64396	2.1891		TCGA-66-2768-01A-01R-0851-07	3.88617	-0.345976		TCGA-A8-A09V-01A-11R-A034-07	-0.865525	-0.132897
TCGA-67-3772-01A-01R-0946-07	-0.439156	-2.66331		TCGA-66-2769-01A-02R-0851-07	6.1737	-3.85097		TCGA-A8-A09W-01A-11R-A00Z-07	-5.01796	3.27086
TCGA-67-3773-01A-01R-0946-07	-3.82935	-5.98661		TCGA-66-2770-01A-01R-0851-07	0.569536	-1.47811		TCGA-A8-A09X-01A-11R-A00Z-07	-1.23573	0.548621
TCGA-67-3774-01A-01R-0946-07	-0.835447	-3.70184		TCGA-66-2771-01A-01R-0980-07	-5.91912	-2.36907		TCGA-A8-A0A1-01A-11R-A00Z-07	1.8997	-1.57795
TCGA-67-4679-01B-01R-1755-07	-1.87591	-5.70172		TCGA-66-2773-01A-01R-1201-07	-0.588534	-1.63171		TCGA-A8-A0A2-01A-11R-A034-07	-0.365674	-1.26219
TCGA-67-6215-01A-11R-1755-07	-4.27808	-2.68835		TCGA-66-2777-01A-01R-1201-07	1.9003	-0.285996		TCGA-A8-A0A4-01A-11R-A00Z-07	1.97656	-2.38167
TCGA-67-6216-01A-11R-1755-07	-1.32743	-4.40042		TCGA-66-2778-01A-02R-0851-07	-6.41126	0.125195		TCGA-A8-A0A7-01A-11R-A00Z-07	2.30737	-1.44939
TCGA-67-6217-01A-11R-1755-07	-3.46405	-4.01562		TCGA-66-2780-01A-01R-0851-07	6.61643	-2.32759		TCGA-A8-A0A9-01A-11R-A00Z-07	2.08283	0.354375
TCGA-69-7760-01A-11R-2170-07	-1.37355	1.57937		TCGA-66-2781-01A-01R-0851-07	0.237392	0.222193		TCGA-A8-A0AB-01A-11R-A034-07	-3.83826	1.34064
TCGA-69-7761-01A-11R-2170-07	2.8815	2.67225		TCGA-66-2782-01A-01R-0851-07	2.41803	-2.00134		TCGA-A8-A0AD-01A-11R-A056-07	2.06742	0.637463
TCGA-69-7763-01A-11R-2170-07	3.85714	-2.82888		TCGA-66-2783-01A-01R-1201-07	-2.49527	1.07205		TCGA-AC-A23C-01A-12R-A169-07	-0.97156	1.08758
TCGA-69-7764-01A-11R-2170-07	-3.53396	-1.7049		TCGA-66-2786-01A-01R-0851-07	1.95511	-4.5118		TCGA-AC-A23E-01A-11R-A157-07	6.32331	-1.60837
TCGA-69-7765-01A-11R-2170-07	3.27131	-1.34868		TCGA-66-2787-01A-01R-0980-07	-5.66761	1.69667		TCGA-AC-A2B8-01A-11R-A17B-07	4.72811	-2.31039
TCGA-71-6725-01A-11R-1858-07	-4.80876	-1.28781		TCGA-66-2788-01A-01R-0980-07	5.40156	-1.19013		TCGA-AC-A2BM-01A-11R-A21T-07	-6.13055	2.51691
TCGA-73-4658-01A-01R-1755-07	5.8746	-2.09946		TCGA-66-2789-01A-01R-0980-07	3.18893	-2.59155		TCGA-AC-A2FB-01A-11R-A17B-07	-0.565533	-3.53323
TCGA-73-4659-01A-01R-1206-07	1.1206	-1.20732		TCGA-66-2790-01A-01R-0980-07	2.87728	-1.8675		TCGA-AC-A2FF-01A-11R-A17B-07	3.2448	-4.21981
TCGA-73-4662-01A-01R-1206-07	-2.77343	-1.65639		TCGA-66-2791-01A-01R-0980-07	0.354402	-0.984522		TCGA-AC-A2FG-01A-11R-A17B-07	0.185785	-3.92981
TCGA-73-4666-01A-01R-1206-07	-0.680553	2.96162		TCGA-66-2792-01A-01R-0980-07	0.28841	3.31881		TCGA-AC-A3HN-01A-11R-A213-07	7.23705	-4.66428
TCGA-73-4668-01A-01R-1206-07	4.68797	1.40061		TCGA-66-2793-01A-01R-1201-07	-5.94075	1.40903		TCGA-AN-A03X-01A-21R-A00Z-07	5.72008	-0.024723
TCGA-73-4670-01A-01R-1206-07	2.10918	4.59561		TCGA-66-2794-01A-01R-1201-07	-5.99727	0.172291		TCGA-AN-A03Y-01A-21R-A00Z-07	-4.08783	0.160535
TCGA-73-4675-01A-01R-1206-07	2.04598	-4.42996		TCGA-66-2795-01A-02R-0980-07	-1.96184	0.792286		TCGA-AN-A041-01A-11R-A034-07	3.90151	0.298413
TCGA-73-4676-01A-01R-1755-07	0.297046	3.83772		TCGA-66-2800-01A-01R-1201-07	0.201068	-0.243244		TCGA-AN-A049-01A-21R-A00Z-07	2.0901	-1.13843
TCGA-73-4677-01A-01R-1206-07	-5.93751	-3.54231		TCGA-70-6722-01A-11R-1820-07	7.11047	-1.78132		TCGA-AN-A04A-01A-21R-A034-07	6.51268	0.176672
TCGA-73-7498-01A-12R-2187-07	-1.11054	-6.64646		TCGA-70-6723-01A-11R-1820-07	-4.45617	4.98108		TCGA-AN-A04C-01A-21R-A034-07	-3.4969	1.47701
TCGA-73-7499-01A-11R-2187-07	-2.90468	-0.28033		TCGA-77-6842-01A-11R-1949-07	0.385746	-2.68574		TCGA-AN-A0AJ-01A-11R-A00Z-07	-2.44229	2.89587
TCGA-75-5122-01A-01R-1755-07	0.626411	-1.82454		TCGA-77-6843-01A-11R-1949-07	-4.80215	3.4867		TCGA-AN-A0AK-01A-21R-A00Z-07	-8.23286	8.05351
TCGA-75-5125-01A-01R-1755-07	0.795495	1.04263		TCGA-77-6844-01A-11R-1949-07	-3.9012	0.519643		TCGA-AN-A0AM-01A-11R-A034-07	1.79414	-0.278668
TCGA-75-5126-01A-01R-1755-07	3.50266	0.64097		TCGA-77-6845-01A-11R-1949-07	-3.51044	5.77161		TCGA-AN-A0AS-01A-11R-A00Z-07	5.79152	-0.481876
TCGA-75-5146-01A-01R-1628-07	-6.16153	-2.6525		TCGA-77-7139-01A-11R-2045-07	-7.65312	3.93171		TCGA-AN-A0FD-01A-11R-A034-07	4.08316	-1.03808
TCGA-75-5147-01A-01R-1628-07	-0.298394	0.601901		TCGA-77-7141-01A-11R-2045-07	-4.61756	1.73924		TCGA-AN-A0FF-01A-11R-A034-07	-1.32947	0.331522
TCGA-75-6203-01A-11R-1755-07	-0.120585	-5.71612		TCGA-77-7142-01A-11R-2045-07	-0.706695	2.48368		TCGA-AN-A0FK-01A-11R-A034-07	-3.23823	1.88978
TCGA-75-6205-01A-11R-1755-07	5.51161	0.720035		TCGA-77-7335-01A-11R-2045-07	2.93955	-3.21243		TCGA-AN-A0FN-01A-11R-A034-07	10.6692	-4.95759
TCGA-75-6206-01A-11R-1755-07	-2.44854	-3.69026		TCGA-77-7337-01A-21R-2045-07	3.77364	2.88742		TCGA-AN-A0FS-01A-11R-A034-07	2.38419	-2.48095
TCGA-75-6207-01A-11R-1755-07	-3.16134	2.60155		TCGA-77-7338-01A-11R-2045-07	4.74243	1.51802		TCGA-AN-A0FT-01A-11R-A034-07	0.744588	-0.910791
TCGA-75-6211-01A-11R-1755-07	-2.18594	1.76206		TCGA-77-7463-01A-11R-2045-07	-6.70404	4.0465		TCGA-AN-A0FV-01A-11R-A00Z-07	3.1256	2.64872
TCGA-75-6212-01A-11R-1755-07	-0.00405067	-4.85211		TCGA-77-7465-01A-11R-2045-07	-4.44011	-1.13716		TCGA-AN-A0FW-01A-11R-A034-07	-3.39423	1.48858
TCGA-75-7027-01A-11R-1949-07	4.70343	3.61364		TCGA-79-5596-01A-31R-1949-07	-0.686241	3.40615		TCGA-AN-A0FY-01A-11R-A034-07	2.25128	0.493374
TCGA-75-7030-01A-11R-1949-07	11.3394	-1.72627		TCGA-85-6175-01A-11R-1820-07	12.2115	-5.55123		TCGA-AN-A0FZ-01A-11R-A034-07	-0.783828	1.33924
TCGA-78-7143-01A-11R-2039-07	-2.81647	0.0438712		TCGA-85-6561-01A-11R-1820-07	4.18286	-0.825765		TCGA-AN-A0XL-01A-11R-A10J-07	3.49315	-1.38639
TCGA-78-7145-01A-11R-2039-07	1.15513	1.96925		TCGA-85-6798-01A-11R-1949-07	1.7829	3.46716		TCGA-AN-A0XN-01A-21R-A109-07	10.9121	-1.33782
TCGA-78-7146-01A-11R-2039-07	1.2292	6.23051		TCGA-85-7710-01A-11R-2125-07	0.929161	-0.690595		TCGA-AN-A0XO-01A-11R-A109-07	3.72432	-0.141042
TCGA-78-7147-01A-11R-2039-07	-4.07016	-0.936797		TCGA-85-7844-01A-11R-2125-07	3.91434	0.0541954		TCGA-AN-A0XP-01A-11R-A109-07	-0.935578	-0.23403
TCGA-78-7148-01A-11R-2039-07	-3.94893	1.35937		TCGA-85-7950-01A-11R-2187-07	3.69542	-2.34657		TCGA-AN-A0XR-01A-11R-A109-07	-2.64366	0.657554
TCGA-78-7149-01A-11R-2039-07	-2.57632	-2.32594		TCGA-90-6837-01A-11R-1949-07	7.27922	-1.28269		TCGA-AN-A0XS-01A-22R-A109-07	3.86516	-3.09698
TCGA-78-7150-01A-21R-2039-07	3.30606	7.97604		TCGA-92-7340-01A-21R-2045-07	5.6318	-0.82098		TCGA-AN-A0XT-01A-11R-A109-07	-3.50258	-1.324
TCGA-78-7152-01A-11R-2039-07	-3.34701	-2.37778		TCGA-94-7033-01A-11R-1949-07	-2.67046	-0.891172		TCGA-AN-A0XV-01A-11R-A109-07	1.58057	-0.653505
TCGA-78-7153-01A-11R-2039-07	-6.81396	-2.8715		TCGA-94-7557-01A-11R-2125-07	0.673835	0.284713		TCGA-AN-A0XW-01A-11R-A109-07	6.12266	-0.764869
TCGA-78-7154-01A-11R-2039-07	-4.16396	5.93205		TCGA-94-7943-01A-11R-2187-07	-1.90584	-0.61078		TCGA-AO-A03L-01A-41R-A056-07	1.91236	1.08994
TCGA-78-7156-01A-11R-2039-07	-10.1021	-3.98126		TCGA-96-7544-01A-11R-2045-07	-0.157478	1.5069		TCGA-AO-A03M-01B-11R-A10J-07	-1.0215	-0.388721
TCGA-78-7158-01A-11R-2039-07	-5.99764	-0.511281						TCGA-AO-A03N-01B-11R-A10J-07	1.52517	0.746759
TCGA-78-7159-01A-11R-2039-07	-1.60145	1.60189						TCGA-AO-A03O-01A-11R-A00Z-07	-6.88138	2.10597
TCGA-78-7160-01A-11R-2039-07	0.566266	-0.172079						TCGA-AO-A03P-01A-11R-A00Z-07	-4.90716	2.21445
TCGA-78-7161-01A-11R-2039-07	-1.4614	-1.12148						TCGA-AO-A03R-01A-21R-A034-07	-2.5164	-1.9987
TCGA-78-7162-01A-21R-2066-07	-2.98534	-3.38325						TCGA-AO-A03T-01A-21R-A034-07	-1.36162	-0.962625
TCGA-78-7163-01A-12R-2066-07	-10.9578	-4.37819						TCGA-AO-A03V-01A-11R-A115-07	1.06582	-0.486776
TCGA-78-7166-01A-12R-2066-07	-1.84623	1.47166						TCGA-AO-A0J2-01A-11R-A034-07	-1.24975	0.524751
TCGA-78-7167-01A-11R-2066-07	-4.45149	-4.91695						TCGA-AO-A0J3-01A-11R-A034-07	-12.5916	5.01258
TCGA-78-7535-01A-11R-2066-07	0.294732	-2.30198						TCGA-AO-A0J5-01A-11R-A034-07	5.82464	0.0810871
TCGA-78-7536-01A-11R-2066-07	-7.27874	4.35798						TCGA-AO-A0J7-01A-11R-A034-07	-2.48834	1.34668
TCGA-78-7537-01A-11R-2066-07	-2.44697	-6.03494						TCGA-AO-A0J8-01A-21R-A034-07	0.633387	-0.854594
TCGA-78-7539-01A-11R-2066-07	-4.13669	-3.78697						TCGA-AO-A0J9-01A-11R-A034-07	5.71706	-4.96584
TCGA-78-7540-01A-11R-2066-07	-0.832495	0.354866						TCGA-AO-A0JA-01A-11R-A056-07	3.58581	0.439711
TCGA-78-7633-01A-11R-2066-07	-6.16007	-2.73225						TCGA-AO-A0JC-01A-11R-A056-07	-2.50516	-6.41897
TCGA-80-5607-01A-31R-1949-07	-0.434735	-0.711713						TCGA-AO-A0JD-01A-11R-A056-07	-8.92109	3.56888
TCGA-80-5608-01A-31R-1949-07	-4.34509	-0.477467						TCGA-AO-A0JE-01A-11R-A056-07	5.41541	-0.267883
TCGA-80-5611-01A-01R-1628-07	-2.78434	2.75829						TCGA-AO-A0JF-01A-11R-A056-07	4.16529	-3.26317
TCGA-83-5908-01A-21R-2287-07	4.32507	3.42396						TCGA-AO-A0JG-01A-31R-A084-07	-0.762329	-1.30075
TCGA-86-6562-01A-11R-1755-07	4.41258	1.24594						TCGA-AO-A0JI-01A-21R-A056-07	-8.78788	1.73612
TCGA-86-6851-01A-11R-1949-07	1.16326	-1.36057						TCGA-AO-A0JJ-01A-11R-A056-07	1.82567	-2.96559
TCGA-86-7701-01A-11R-2170-07	-1.08587	1.82104						TCGA-AO-A0JM-01A-21R-A056-07	4.15251	2.21454
TCGA-86-7711-01A-11R-2066-07	0.882794	5.85807						TCGA-AO-A125-01A-11R-A10J-07	-8.41879	-0.71857
TCGA-86-7713-01A-11R-2066-07	-7.01223	3.38561						TCGA-AO-A126-01A-11R-A10J-07	4.13442	-3.2243
TCGA-86-7953-01A-11R-2187-07	2.15075	0.429708						TCGA-AO-A12A-01A-21R-A115-07	3.04267	-3.47565
TCGA-86-7954-01A-11R-2187-07	0.676913	-0.21603						TCGA-AO-A12B-01A-11R-A10J-07	-9.30679	1.21302
TCGA-86-7955-01A-11R-2187-07	-9.62868	5.09393						TCGA-AO-A12C-01A-11R-A10J-07	4.77735	-1.64754
TCGA-91-6828-01A-11R-1858-07	-1.14374	-0.449375						TCGA-AO-A12D-01A-11R-A115-07	3.30045	-0.0551079
TCGA-91-6829-01A-21R-1858-07	6.23609	1.69376						TCGA-AO-A12E-01A-11R-A10J-07	-0.425841	-1.31384
TCGA-91-6830-01A-11R-1949-07	3.35909	1.21657						TCGA-AO-A12G-01A-11R-A10J-07	1.93081	-1.70472
TCGA-91-6831-01A-11R-1858-07	1.57636	3.1654						TCGA-AO-A12H-01A-11R-A115-07	-5.50125	0.0453589
TCGA-91-6835-01A-11R-1858-07	2.30576	0.237827						TCGA-AO-A1KO-01A-31R-A13Q-07	-2.17927	-1.91485
TCGA-91-6836-01A-21R-1858-07	-1.57307	3.76554						TCGA-AO-A1KP-01A-11R-A13Q-07	-6.54289	2.62358
TCGA-91-6840-01A-11R-1949-07	0.864827	1.36209						TCGA-AO-A1KQ-01A-11R-A13Q-07	-2.87226	2.07255
TCGA-91-6849-01A-11R-1949-07	-2.84424	-4.43685						TCGA-AO-A1KS-01A-11R-A13Q-07	-7.58208	4.618
TCGA-91-7771-01A-11R-2170-07	-1.32768	-2.36471						TCGA-AO-A1KT-01A-11R-A13Q-07	2.61398	1.1572
TCGA-93-7348-01A-21R-2039-07	3.69685	-1.62374						TCGA-AQ-A04H-01B-11R-A10J-07	-2.71043	2.37327
TCGA-95-7039-01A-11R-1949-07	3.10426	1.42388						TCGA-AQ-A04L-01B-21R-A10J-07	1.9448	0.570501
TCGA-95-7043-01A-11R-1949-07	-7.59849	1.86826						TCGA-AQ-A0Y5-01A-11R-A14M-07	2.85752	-0.0991441
TCGA-95-7567-01A-11R-2066-07	-1.0666	1.59916						TCGA-AQ-A1H2-01A-11R-A13Q-07	-6.14355	-0.114985
TCGA-95-7944-01A-11R-2187-07	1.90673	0.508668						TCGA-AQ-A1H3-01A-31R-A13Q-07	1.45686	-1.0824
TCGA-95-7947-01A-11R-2187-07	-4.93462	1.90128						TCGA-AR-A0TQ-01A-11R-A084-07	-2.23016	0.244121
TCGA-95-7948-01A-11R-2187-07	-4.20229	-2.61785						TCGA-AR-A0TR-01A-11R-A084-07	-14.3016	1.80417
TCGA-97-7546-01A-11R-2039-07	0.0188302	-1.88388						TCGA-AR-A0TT-01A-31R-A084-07	0.969955	-1.42474
TCGA-97-7552-01A-11R-2039-07	-0.683838	-1.15505						TCGA-AR-A0TV-01A-21R-A084-07	-8.18552	2.42114
TCGA-97-7553-01A-21R-2039-07	2.10148	-2.54573						TCGA-AR-A0TW-01A-11R-A084-07	-5.64562	2.94754
TCGA-97-7554-01A-11R-2039-07	3.44776	-0.121162						TCGA-AR-A0TX-01A-11R-A084-07	1.21941	-0.435385
TCGA-97-7937-01A-11R-2170-07	-1.96739	0.191104						TCGA-AR-A0TY-01A-12R-A115-07	-5.43874	4.58311
TCGA-97-7938-01A-11R-2170-07	-0.609421	-1.02627						TCGA-AR-A0TZ-01A-12R-A084-07	-1.55303	3.0872
TCGA-97-7941-01A-11R-2187-07	0.16711	-3.87595						TCGA-AR-A0U2-01A-11R-A109-07	-8.47679	8.41674
TCGA-99-7458-01A-11R-2039-07	1.28485	-0.928216						TCGA-AR-A0U3-01A-11R-A109-07	-6.31723	2.11428
								TCGA-AR-A1AK-01A-21R-A12P-07	1.3114	-2.82437
								TCGA-AR-A1AL-01A-21R-A12P-07	3.41978	-2.35492
								TCGA-AR-A1AN-01A-11R-A12P-07	4.33065	-1.23964
								TCGA-AR-A1AO-01A-11R-A12P-07	5.54616	-4.38049
								TCGA-AR-A1AP-01A-11R-A12P-07	1.11358	-0.720708
								TCGA-AR-A1AS-01A-11R-A12P-07	0.0172915	0.946479
								TCGA-AR-A1AU-01A-11R-A12P-07	3.8929	-0.917789
								TCGA-AR-A1AV-01A-21R-A12P-07	-0.662043	1.90249
								TCGA-AR-A1AW-01A-21R-A12P-07	-2.19267	-2.57118
								TCGA-AR-A24H-01A-11R-A169-07	-8.63414	5.09125
								TCGA-AR-A24K-01A-11R-A169-07	-5.5921	4.07428
								TCGA-AR-A24L-01A-11R-A169-07	2.11537	2.56682
								TCGA-AR-A24M-01A-11R-A169-07	0.673504	-0.591023
								TCGA-AR-A24N-01A-11R-A169-07	-1.87839	2.13909
								TCGA-AR-A24O-01A-11R-A169-07	4.83847	-2.41201
								TCGA-AR-A24P-01A-11R-A169-07	3.01451	0.0307757
								TCGA-AR-A24R-01A-11R-A169-07	-4.19386	2.62587
								TCGA-AR-A24S-01A-11R-A169-07	2.47432	1.22369
								TCGA-AR-A24T-01A-11R-A169-07	5.50908	-1.72814
								TCGA-AR-A24U-01A-11R-A169-07	1.71346	1.02401
								TCGA-AR-A24V-01A-21R-A169-07	5.3532	0.137473
								TCGA-AR-A24W-01A-11R-A169-07	3.78312	-1.64321
								TCGA-AR-A24X-01A-11R-A169-07	0.661415	1.26572
								TCGA-AR-A24Z-01A-11R-A169-07	-4.6631	4.43909
								TCGA-AR-A250-01A-31R-A169-07	3.79806	0.356329
								TCGA-AR-A252-01A-11R-A169-07	-2.38676	-0.197104
								TCGA-AR-A254-01A-21R-A169-07	1.40887	1.22871
								TCGA-AR-A255-01A-11R-A169-07	1.76708	-0.08442
								TCGA-AR-A2LE-01A-11R-A180-07	-1.6061	-0.53314
								TCGA-AR-A2LH-01A-31R-A18M-07	3.11342	-3.42021
								TCGA-AR-A2LK-01A-11R-A180-07	-1.02661	2.61116
								TCGA-AR-A2LM-01A-11R-A180-07	5.28349	-2.06317
								TCGA-AR-A2LN-01A-21R-A18M-07	6.2425	-5.54136
								TCGA-AR-A2LO-01A-31R-A18M-07	3.70101	-3.21538
								TCGA-AR-A2LQ-01A-22R-A18M-07	8.87213	-4.07105
								TCGA-B6-A0I5-01A-11R-A034-07	1.63284	-2.93995
								TCGA-B6-A0I8-01A-11R-A034-07	-2.38519	0.780114
								TCGA-B6-A0I9-01A-11R-A034-07	-3.71052	2.92819
								TCGA-B6-A0IA-01A-11R-A034-07	-7.09151	1.29889
								TCGA-B6-A0IB-01A-11R-A034-07	-3.85062	2.06685
								TCGA-B6-A0IC-01A-11R-A034-07	-10.758	-0.267335
								TCGA-B6-A0IE-01A-11R-A034-07	-2.57796	-0.337388
								TCGA-B6-A0IG-01A-11R-A034-07	-0.602129	-0.109877
								TCGA-B6-A0IH-01A-11R-A115-07	3.62667	-4.79999
								TCGA-B6-A0IK-01A-12R-A056-07	0.139836	2.28195
								TCGA-B6-A0IM-01A-11R-A034-07	0.257749	1.55653
								TCGA-B6-A0IN-01A-11R-A034-07	1.17758	-2.2858
								TCGA-B6-A0IO-01A-11R-A034-07	-3.72979	0.103606
								TCGA-B6-A0IP-01A-11R-A034-07	-0.420713	-2.66979
								TCGA-B6-A0RG-01A-11R-A056-07	-0.288983	2.47015
								TCGA-B6-A0RH-01A-21R-A115-07	2.55645	-0.826706
								TCGA-B6-A0RI-01A-11R-A056-07	5.36592	-0.0763196
								TCGA-B6-A0RL-01A-11R-A084-07	-14.4153	4.42341
								TCGA-B6-A0RM-01A-11R-A084-07	-7.52486	0.567811
								TCGA-B6-A0RN-01A-12R-A084-07	2.06868	-1.68708
								TCGA-B6-A0RO-01A-22R-A084-07	-6.39271	0.400113
								TCGA-B6-A0RP-01A-21R-A084-07	3.04218	-1.85213
								TCGA-B6-A0RQ-01A-11R-A115-07	0.596091	-4.88169
								TCGA-B6-A0RS-01A-11R-A084-07	3.58344	0.303415
								TCGA-B6-A0RV-01A-11R-A084-07	-3.20004	-1.87083
								TCGA-B6-A0WS-01A-11R-A115-07	1.18862	-1.27634
								TCGA-B6-A0WT-01A-11R-A109-07	1.9151	1.02935
								TCGA-B6-A0WV-01A-11R-A109-07	-4.19488	4.4172
								TCGA-B6-A0WW-01A-11R-A109-07	-1.6935	2.85909
								TCGA-B6-A0WY-01A-11R-A109-07	4.3097	-2.48133
								TCGA-B6-A0WZ-01A-11R-A109-07	-0.893336	-2.40044
								TCGA-B6-A0X0-01A-21R-A115-07	-3.76347	-1.42096
								TCGA-B6-A0X4-01A-11R-A109-07	-8.55493	1.43147
								TCGA-B6-A0X5-01A-21R-A109-07	-9.21414	3.63285
								TCGA-B6-A0X7-01A-11R-A10J-07	2.00941	-2.44023
								TCGA-B6-A1KI-01A-11R-A14M-07	-0.0969551	-2.36088
								TCGA-B6-A1KN-01A-11R-A13Q-07	-2.48403	2.31664
								TCGA-B6-A2IU-01A-32R-A18M-07	-4.78717	-1.18876
								TCGA-BH-A0AU-01A-11R-A12P-07	0.340344	1.68405
								TCGA-BH-A0AW-01A-11R-A056-07	0.761468	-0.621027
								TCGA-BH-A0AY-01A-21R-A00Z-07	3.60505	-1.60615
								TCGA-BH-A0AZ-01A-21R-A12P-07	9.28686	-3.31118
								TCGA-BH-A0B0-01A-21R-A115-07	5.7132	-5.00052
								TCGA-BH-A0B4-01A-11R-A00Z-07	3.98205	-1.82344
								TCGA-BH-A0B5-01A-11R-A12P-07	3.95047	-1.52809
								TCGA-BH-A0B7-01A-12R-A115-07	3.88814	-1.04212
								TCGA-BH-A0BA-01A-11R-A056-07	-1.45326	-2.43545
								TCGA-BH-A0BC-01A-22R-A084-07	3.18485	-1.59107
								TCGA-BH-A0BD-01A-11R-A034-07	2.21192	-0.886486
								TCGA-BH-A0BF-01A-21R-A12P-07	4.93608	-2.12243
								TCGA-BH-A0BJ-01A-11R-A056-07	3.17318	-2.09845
								TCGA-BH-A0BM-01A-11R-A056-07	1.70062	-5.10143
								TCGA-BH-A0BO-01A-23R-A12D-07	8.02412	-4.38902
								TCGA-BH-A0BP-01A-11R-A115-07	5.71983	-3.34205
								TCGA-BH-A0BQ-01A-21R-A115-07	5.86007	-4.08667
								TCGA-BH-A0BR-01A-21R-A115-07	8.19874	-1.60697
								TCGA-BH-A0BS-01A-11R-A12P-07	-5.77195	1.34149
								TCGA-BH-A0BT-01A-11R-A12P-07	-0.00725204	-1.09932
								TCGA-BH-A0BV-01A-11R-A00Z-07	0.688835	-0.766905
								TCGA-BH-A0BZ-01A-31R-A12P-07	2.92668	0.031725
								TCGA-BH-A0C0-01A-21R-A056-07	-3.61979	-0.671028
								TCGA-BH-A0C1-01B-11R-A12D-07	2.52399	-0.950237
								TCGA-BH-A0C3-01A-21R-A12P-07	2.4077	-2.13039
								TCGA-BH-A0C7-01B-11R-A115-07	-0.0839478	2.57853
								TCGA-BH-A0DD-01A-31R-A12P-07	-3.813	5.16118
								TCGA-BH-A0DE-01A-11R-A115-07	3.77728	-3.62096
								TCGA-BH-A0DG-01A-21R-A12P-07	5.12255	-1.82994
								TCGA-BH-A0DH-01A-11R-A084-07	-2.6656	-0.0885578
								TCGA-BH-A0DI-01A-21R-A12P-07	8.7223	-3.84866
								TCGA-BH-A0DK-01A-21R-A056-07	3.80013	-2.68365
								TCGA-BH-A0DO-01B-11R-A12D-07	-0.739279	-3.01887
								TCGA-BH-A0DP-01A-21R-A056-07	3.63172	-3.38163
								TCGA-BH-A0DQ-01A-11R-A084-07	6.15542	-1.77154
								TCGA-BH-A0DS-01A-11R-A056-07	1.8214	-2.82815
								TCGA-BH-A0DT-01A-21R-A12D-07	2.49504	-2.75483
								TCGA-BH-A0DV-01A-21R-A12P-07	8.97794	-5.46542
								TCGA-BH-A0DX-01A-11R-A115-07	6.03985	-2.58398
								TCGA-BH-A0DZ-01A-11R-A00Z-07	5.42644	-0.169504
								TCGA-BH-A0E1-01A-11R-A056-07	-1.46423	0.00318742
								TCGA-BH-A0E2-01A-11R-A056-07	2.05549	0.692357
								TCGA-BH-A0E7-01A-11R-A034-07	-3.64053	0.706448
								TCGA-BH-A0E9-01B-11R-A115-07	1.79414	-3.12275
								TCGA-BH-A0EA-01A-11R-A115-07	4.66032	-5.55304
								TCGA-BH-A0EB-01A-11R-A034-07	1.82899	-2.46254
								TCGA-BH-A0EE-01A-11R-A034-07	-9.18776	4.40255
								TCGA-BH-A0EI-01A-11R-A115-07	5.25603	-0.902596
								TCGA-BH-A0GY-01A-11R-A056-07	1.51562	0.82581
								TCGA-BH-A0GZ-01A-11R-A056-07	2.48114	-1.89406
								TCGA-BH-A0H0-01A-11R-A056-07	-8.66835	4.33797
								TCGA-BH-A0H3-01A-11R-A12P-07	3.14699	-2.82984
								TCGA-BH-A0H5-01A-21R-A115-07	-0.452601	-5.33067
								TCGA-BH-A0H6-01A-21R-A056-07	3.8462	-0.893576
								TCGA-BH-A0H7-01A-13R-A056-07	4.15555	0.645514
								TCGA-BH-A0H9-01A-11R-A056-07	-3.20993	1.30468
								TCGA-BH-A0HA-01A-11R-A12P-07	5.00017	-2.97381
								TCGA-BH-A0HB-01A-11R-A056-07	-0.909405	0.35348
								TCGA-BH-A0HI-01A-11R-A084-07	0.914268	-1.66821
								TCGA-BH-A0HK-01A-11R-A056-07	-0.778843	-1.62333
								TCGA-BH-A0HO-01A-11R-A034-07	-4.35737	-0.294567
								TCGA-BH-A0HP-01A-12R-A084-07	1.29911	-2.59679
								TCGA-BH-A0HQ-01A-11R-A034-07	3.62232	-2.85909
								TCGA-BH-A0HU-01A-11R-A034-07	-3.38085	1.85282
								TCGA-BH-A0HW-01A-11R-A034-07	-8.67359	2.50755
								TCGA-BH-A0HX-01A-21R-A056-07	0.779059	1.79221
								TCGA-BH-A0HY-01A-11R-A056-07	2.2967	1.60586
								TCGA-BH-A0W3-01A-11R-A109-07	-7.74447	0.754146
								TCGA-BH-A0W4-01A-11R-A109-07	4.54893	-1.9471
								TCGA-BH-A0W5-01A-11R-A109-07	2.76819	-3.73051
								TCGA-BH-A0W7-01A-11R-A115-07	5.65402	-2.48811
								TCGA-BH-A18F-01A-11R-A12D-07	3.35044	-1.24724
								TCGA-BH-A18H-01A-11R-A12D-07	-0.223064	-2.34159
								TCGA-BH-A18I-01A-11R-A12D-07	6.19729	-2.47514
								TCGA-BH-A18J-01A-11R-A12D-07	4.73028	-0.902444
								TCGA-BH-A18K-01A-11R-A12D-07	4.14237	-0.657298
								TCGA-BH-A18L-01A-32R-A12D-07	-11.6398	5.6804
								TCGA-BH-A18M-01A-11R-A12D-07	4.49396	-1.77035
								TCGA-BH-A18N-01A-11R-A12D-07	-4.46299	-0.298723
								TCGA-BH-A18P-01A-11R-A12D-07	0.0952601	0.662103
								TCGA-BH-A18R-01A-11R-A12D-07	-4.6892	2.89528
								TCGA-BH-A18S-01A-11R-A12D-07	-8.56366	1.19998
								TCGA-BH-A18U-01A-21R-A12D-07	-2.82747	3.42456
								TCGA-BH-A1EN-01A-11R-A13Q-07	-3.40056	3.84004
								TCGA-BH-A1EO-01A-11R-A137-07	5.58152	-0.517362
								TCGA-BH-A1ES-01A-11R-A137-07	1.61028	1.05102
								TCGA-BH-A1ET-01A-11R-A137-07	-2.41809	-1.2417
								TCGA-BH-A1EU-01A-11R-A137-07	0.468784	-2.32608
								TCGA-BH-A1EV-01A-11R-A137-07	1.60998	1.04637
								TCGA-BH-A1EW-01A-11R-A137-07	-1.76544	-0.59409
								TCGA-BH-A1EX-01A-11R-A13Q-07	1.93713	-0.150267
								TCGA-BH-A1EY-01A-11R-A13Q-07	1.53884	-1.87011
								TCGA-BH-A1F2-01A-31R-A13Q-07	0.929565	3.34784
								TCGA-BH-A1F8-01A-11R-A13Q-07	-6.87795	5.63407
								TCGA-BH-A1FB-01A-11R-A13Q-07	3.95528	-3.64477
								TCGA-BH-A1FD-01A-11R-A13Q-07	-2.07712	1.3025
								TCGA-BH-A1FE-01A-11R-A13Q-07	2.98004	0.374068
								TCGA-BH-A1FG-01A-11R-A13Q-07	-8.0851	1.9354
								TCGA-BH-A1FH-01A-12R-A13Q-07	7.13108	-3.35195
								TCGA-BH-A1FJ-01A-11R-A13Q-07	-4.57749	3.65516
								TCGA-BH-A1FL-01A-11R-A13Q-07	-3.04308	-0.498837
								TCGA-BH-A1FM-01A-11R-A13Q-07	-1.85152	7.21419
								TCGA-BH-A1FN-01A-11R-A13Q-07	3.37243	3.85629
								TCGA-BH-A1FR-01A-11R-A13Q-07	-3.9216	0.0486299
								TCGA-BH-A1FU-01A-11R-A14D-07	7.75066	-0.0489278
								TCGA-BH-A201-01A-11R-A14M-07	6.32584	-0.666757
								TCGA-BH-A202-01A-11R-A14M-07	-1.88431	1.5166
								TCGA-BH-A203-01A-12R-A169-07	-0.015547	2.50735
								TCGA-BH-A204-01A-11R-A157-07	-8.11887	7.22558
								TCGA-BH-A208-01A-11R-A157-07	11.9058	-3.32105
								TCGA-BH-A209-01A-11R-A157-07	-4.18501	1.87403
								TCGA-BH-A28Q-01A-11R-A16F-07	0.740797	-0.906276
								TCGA-BH-A2L8-01A-11R-A18M-07	3.71938	-3.41914
								TCGA-C8-A12L-01A-11R-A115-07	2.2931	3.58276
								TCGA-C8-A12M-01A-11R-A115-07	-7.42663	4.49923
								TCGA-C8-A12N-01A-11R-A115-07	4.27468	-2.98162
								TCGA-C8-A12O-01A-11R-A115-07	5.10886	1.64596
								TCGA-C8-A12P-01A-11R-A115-07	2.85426	1.53573
								TCGA-C8-A12Q-01A-11R-A115-07	2.20142	1.15609
								TCGA-C8-A12T-01A-11R-A115-07	6.47742	0.086756
								TCGA-C8-A12U-01A-11R-A115-07	-9.15908	2.88671
								TCGA-C8-A12W-01A-11R-A115-07	3.38186	1.42974
								TCGA-C8-A12X-01A-11R-A115-07	-4.61056	0.976945
								TCGA-C8-A12Y-01A-11R-A12D-07	0.89035	-0.0946942
								TCGA-C8-A12Z-01A-11R-A115-07	-1.10769	3.71323
								TCGA-C8-A130-01A-31R-A115-07	1.11299	-0.271451
								TCGA-C8-A131-01A-11R-A115-07	7.06001	-0.280537
								TCGA-C8-A132-01A-31R-A115-07	5.75752	-1.73101
								TCGA-C8-A133-01A-32R-A12D-07	-16.6364	0.21815
								TCGA-C8-A135-01A-11R-A115-07	2.8475	0.857649
								TCGA-C8-A137-01A-11R-A115-07	-1.02079	3.66678
								TCGA-C8-A138-01A-11R-A115-07	4.29277	-2.01955
								TCGA-C8-A1HE-01A-11R-A13Q-07	-3.29365	-1.11518
								TCGA-C8-A1HF-01A-11R-A137-07	1.44593	0.499937
								TCGA-C8-A1HG-01A-11R-A137-07	-4.67049	2.05975
								TCGA-C8-A1HI-01A-11R-A137-07	-1.61291	0.629148
								TCGA-C8-A1HK-01A-21R-A13Q-07	-6.38361	5.59728
								TCGA-C8-A1HL-01A-11R-A137-07	-1.19737	1.62289
								TCGA-C8-A1HM-01A-12R-A137-07	-6.45403	1.18868
								TCGA-C8-A1HN-01A-11R-A137-07	-4.40954	3.69051
								TCGA-C8-A1HO-01A-11R-A13Q-07	-8.80818	3.83204
								TCGA-C8-A26V-01A-11R-A16F-07	-3.03335	2.11744
								TCGA-C8-A26W-01A-11R-A16F-07	0.688036	0.178731
								TCGA-C8-A26X-01A-31R-A16F-07	4.01301	-1.96299
								TCGA-C8-A26Y-01A-11R-A16F-07	-3.32658	1.40248
								TCGA-C8-A26Z-01A-11R-A16F-07	-2.89981	2.69566
								TCGA-C8-A273-01A-11R-A16F-07	0.434026	1.00557
								TCGA-C8-A274-01A-11R-A16F-07	-4.15198	1.30834
								TCGA-C8-A275-01A-21R-A16F-07	-1.489	0.700409
								TCGA-C8-A278-01A-11R-A169-07	-1.46214	1.87343
								TCGA-C8-A27A-01A-11R-A169-07	-6.04377	5.98078
								TCGA-C8-A3M7-01A-12R-A21T-07	1.66978	-4.32498
								TCGA-C8-A3M8-01A-11R-A213-07	1.47683	0.809423
								TCGA-D8-A13Z-01A-11R-A115-07	4.6444	2.60059
								TCGA-D8-A140-01A-11R-A115-07	-3.49805	1.75341
								TCGA-D8-A141-01A-11R-A115-07	8.17651	-4.06895
								TCGA-D8-A143-01A-11R-A115-07	0.239659	4.04711
								TCGA-D8-A145-01A-11R-A115-07	2.5822	-1.96672
								TCGA-D8-A1J8-01A-11R-A13Q-07	-2.78922	4.14854
								TCGA-D8-A1J9-01A-11R-A13Q-07	0.716131	2.89507
								TCGA-D8-A1JA-01A-11R-A13Q-07	-2.46485	5.7066
								TCGA-D8-A1JB-01A-11R-A13Q-07	-0.76041	-2.38305
								TCGA-D8-A1JC-01A-11R-A13Q-07	0.332921	2.75715
								TCGA-D8-A1JD-01A-11R-A13Q-07	2.53127	1.61578
								TCGA-D8-A1JE-01A-11R-A13Q-07	0.331332	1.96544
								TCGA-D8-A1JF-01A-11R-A13Q-07	-1.71807	2.62951
								TCGA-D8-A1JG-01B-11R-A13Q-07	-1.45597	2.2846
								TCGA-D8-A1JH-01A-11R-A13Q-07	5.22857	-2.87814
								TCGA-D8-A1JI-01A-11R-A13Q-07	-9.13865	1.39129
								TCGA-D8-A1JJ-01A-31R-A14M-07	4.04077	2.20876
								TCGA-D8-A1JK-01A-11R-A13Q-07	6.26095	1.19424
								TCGA-D8-A1JN-01A-11R-A13Q-07	-10.4863	0.64124
								TCGA-D8-A1JP-01A-11R-A13Q-07	4.18357	-1.38871
								TCGA-D8-A1JS-01A-11R-A13Q-07	-11.5758	-0.540494
								TCGA-D8-A1JT-01A-31R-A13Q-07	-13.5108	6.47005
								TCGA-D8-A1JU-01A-11R-A13Q-07	6.44225	-5.27379
								TCGA-D8-A1X5-01A-11R-A14D-07	0.654388	2.45656
								TCGA-D8-A1X6-01A-11R-A14M-07	-8.50656	1.83186
								TCGA-D8-A1X7-01A-11R-A14M-07	-1.30547	2.22593
								TCGA-D8-A1X8-01A-11R-A14M-07	-0.724565	-1.27727
								TCGA-D8-A1X9-01A-12R-A157-07	0.00750182	2.0949
								TCGA-D8-A1XA-01A-11R-A14D-07	-1.69465	1.60477
								TCGA-D8-A1XB-01A-11R-A14D-07	5.39178	-0.667747
								TCGA-D8-A1XC-01A-11R-A14D-07	-9.80204	2.85812
								TCGA-D8-A1XD-01A-11R-A14D-07	2.38731	2.26454
								TCGA-D8-A1XF-01A-11R-A14D-07	-7.37832	4.23726
								TCGA-D8-A1XG-01A-11R-A14D-07	0.393812	0.552054
								TCGA-D8-A1XJ-01A-11R-A14M-07	-0.906702	2.36308
								TCGA-D8-A1XL-01A-11R-A14M-07	-4.62231	1.02904
								TCGA-D8-A1XM-01A-21R-A14M-07	3.3228	-0.308996
								TCGA-D8-A1XO-01A-11R-A14M-07	1.4125	-1.69824
								TCGA-D8-A1XR-01A-11R-A14M-07	-2.80978	1.28639
								TCGA-D8-A1XS-01A-11R-A14M-07	-0.849791	2.44051
								TCGA-D8-A1XT-01A-11R-A14M-07	5.38217	0.773866
								TCGA-D8-A1XU-01A-11R-A14M-07	3.57876	-1.00956
								TCGA-D8-A1XV-01A-11R-A14M-07	-11.9691	3.139
								TCGA-D8-A1XY-01A-11R-A14M-07	2.38009	1.44315
								TCGA-D8-A1XZ-01A-11R-A14M-07	-1.30774	2.35325
								TCGA-D8-A1Y0-01A-11R-A14M-07	-0.113279	0.488987
								TCGA-D8-A1Y1-01A-21R-A14M-07	3.61819	0.287543
								TCGA-D8-A1Y2-01A-11R-A157-07	5.12561	-2.22767
								TCGA-D8-A1Y3-01A-11R-A157-07	-6.79979	2.32334
								TCGA-D8-A27E-01A-11R-A16F-07	-6.7287	-0.12127
								TCGA-D8-A27G-01A-11R-A16F-07	3.93545	-1.37528
								TCGA-D8-A27I-01A-11R-A16F-07	5.13903	-3.57533
								TCGA-D8-A27K-01A-11R-A16F-07	0.812336	-1.13984
								TCGA-D8-A27L-01A-11R-A16F-07	5.4755	-2.18541
								TCGA-D8-A27N-01A-11R-A16F-07	4.6426	0.191649
								TCGA-D8-A27P-01A-11R-A16F-07	1.58584	-2.00251
								TCGA-D8-A27R-01A-11R-A16F-07	-2.03253	1.4479
								TCGA-D8-A27T-01A-11R-A16F-07	4.48361	-1.49191
								TCGA-D8-A27V-01A-12R-A17B-07	-0.951586	-1.4629
								TCGA-D8-A27W-01A-11R-A16F-07	-2.87351	3.8802
								TCGA-E2-A105-01A-11R-A10J-07	-3.55863	1.97578
								TCGA-E2-A108-01A-13R-A10J-07	6.87332	-5.46797
								TCGA-E2-A109-01A-11R-A10J-07	-1.78121	5.29415
								TCGA-E2-A10A-01A-21R-A115-07	-0.912263	1.6368
								TCGA-E2-A10B-01A-11R-A10J-07	-0.00462285	-0.681169
								TCGA-E2-A10C-01A-21R-A10J-07	-2.80046	-0.377366
								TCGA-E2-A10E-01A-21R-A10J-07	0.799932	-1.28951
								TCGA-E2-A10F-01A-11R-A10J-07	6.1601	-1.63055
								TCGA-E2-A14O-01A-31R-A115-07	-4.69647	3.08065
								TCGA-E2-A14P-01A-31R-A12D-07	-1.65059	1.23759
								TCGA-E2-A14Q-01A-11R-A12D-07	0.0409294	-2.13411
								TCGA-E2-A14S-01A-11R-A12D-07	-5.6098	1.25424
								TCGA-E2-A14T-01A-11R-A115-07	-4.77355	2.92092
								TCGA-E2-A14V-01A-11R-A12D-07	-0.481898	3.45877
								TCGA-E2-A14W-01A-11R-A12D-07	-6.35999	4.87322
								TCGA-E2-A14Z-01A-11R-A115-07	2.68936	-2.81682
								TCGA-E2-A152-01A-11R-A12D-07	5.2207	-0.338659
								TCGA-E2-A153-01A-12R-A12D-07	8.28259	-2.632
								TCGA-E2-A154-01A-11R-A115-07	-0.00592092	0.855985
								TCGA-E2-A155-01A-11R-A12D-07	-7.34748	5.53371
								TCGA-E2-A156-01A-11R-A12D-07	-8.47462	-0.226658
								TCGA-E2-A15A-01A-11R-A12D-07	-1.38713	2.90356
								TCGA-E2-A15C-01A-31R-A12D-07	1.10238	-1.24816
								TCGA-E2-A15D-01A-11R-A115-07	0.927544	-2.30573
								TCGA-E2-A15E-01A-11R-A12D-07	1.47277	-1.0876
								TCGA-E2-A15G-01A-11R-A12D-07	-4.69673	-1.28624
								TCGA-E2-A15H-01A-11R-A12D-07	1.09667	0.728463
								TCGA-E2-A15I-01A-21R-A137-07	-2.23135	-2.40779
								TCGA-E2-A15J-01A-11R-A12P-07	-3.26451	0.725862
								TCGA-E2-A15K-01A-11R-A12P-07	-0.28205	-0.66187
								TCGA-E2-A15L-01A-11R-A12D-07	3.69263	-0.479929
								TCGA-E2-A15M-01A-11R-A12D-07	0.0440611	-1.30433
								TCGA-E2-A15O-01A-11R-A115-07	-4.67434	0.712018
								TCGA-E2-A15P-01A-11R-A115-07	-1.34452	-2.10943
								TCGA-E2-A15R-01A-11R-A115-07	-5.81965	4.92294
								TCGA-E2-A15S-01A-11R-A115-07	-6.93585	3.90202
								TCGA-E2-A1B0-01A-11R-A12P-07	4.16844	4.55244
								TCGA-E2-A1B4-01A-11R-A12P-07	-2.46364	-5.69384
								TCGA-E2-A1B5-01A-21R-A12P-07	-1.98149	-3.62749
								TCGA-E2-A1BC-01A-11R-A12P-07	1.46875	-2.1184
								TCGA-E2-A1BD-01A-11R-A12P-07	-0.150654	-3.2522
								TCGA-E2-A1IE-01A-11R-A13Q-07	-4.75353	2.96677
								TCGA-E2-A1IF-01A-11R-A144-07	5.95555	-3.80993
								TCGA-E2-A1IG-01A-11R-A144-07	6.11944	-0.587963
								TCGA-E2-A1IH-01A-11R-A13Q-07	4.84578	-1.4166
								TCGA-E2-A1IJ-01A-11R-A144-07	7.73395	-4.45905
								TCGA-E2-A1IL-01A-11R-A14D-07	1.00726	-1.97198
								TCGA-E2-A1IN-01A-11R-A13Q-07	5.0673	-0.552861
								TCGA-E2-A1IO-01A-11R-A144-07	7.13875	-3.16771
								TCGA-E2-A1IU-01A-11R-A14D-07	-4.78281	-2.42474
								TCGA-E2-A1L6-01A-11R-A13Q-07	0.232678	-1.44595
								TCGA-E2-A1L7-01A-11R-A144-07	-0.0608864	0.274747
								TCGA-E2-A1L8-01A-11R-A13Q-07	0.268357	-0.361566
								TCGA-E2-A1L9-01A-11R-A13Q-07	6.51697	-1.01539
								TCGA-E2-A1LA-01A-11R-A144-07	1.02254	-0.904972
								TCGA-E2-A1LB-01A-11R-A144-07	-0.711353	0.915042
								TCGA-E2-A3DX-01A-21R-A213-07	6.92089	-5.33371
								TCGA-E9-A1N3-01A-12R-A157-07	-9.7092	0.791653
								TCGA-E9-A1N4-01A-11R-A14M-07	1.38113	-1.43065
								TCGA-E9-A1N5-01A-11R-A14D-07	4.32576	-0.913379
								TCGA-E9-A1N6-01A-11R-A144-07	5.62254	1.03983
								TCGA-E9-A1N9-01A-11R-A14D-07	-0.709671	1.39147
								TCGA-E9-A1NA-01A-11R-A144-07	3.79296	0.943923
								TCGA-E9-A1NE-01A-21R-A14M-07	0.184181	-1.54075
								TCGA-E9-A1NF-01A-11R-A14D-07	9.08781	-2.36903
								TCGA-E9-A1NG-01A-21R-A14M-07	10.0684	-3.10125
								TCGA-E9-A1NH-01A-11R-A14D-07	5.79443	-3.39479
								TCGA-E9-A1NI-01A-11R-A14D-07	1.87327	0.0809671
								TCGA-E9-A1QZ-01A-21R-A169-07	-2.10544	-1.78752
								TCGA-E9-A1R0-01A-22R-A16F-07	0.879157	-2.90322
								TCGA-E9-A1R2-01A-11R-A14D-07	-0.501114	0.0316256
								TCGA-E9-A1R3-01A-31R-A14M-07	5.5807	-3.73283
								TCGA-E9-A1R4-01A-21R-A14D-07	0.867847	-0.744015
								TCGA-E9-A1R5-01A-11R-A14M-07	0.0293765	0.980695
								TCGA-E9-A1R6-01A-11R-A14D-07	-2.01427	1.7702
								TCGA-E9-A1R7-01A-11R-A14M-07	-9.32748	6.5875
								TCGA-E9-A1RB-01A-11R-A157-07	-2.15365	2.33271
								TCGA-E9-A1RC-01A-11R-A157-07	-0.875139	1.08169
								TCGA-E9-A1RD-01A-11R-A157-07	-3.65222	-0.081044
								TCGA-E9-A1RE-01A-11R-A157-07	-6.31814	3.72446
								TCGA-E9-A1RF-01A-11R-A157-07	3.33676	0.0344229
								TCGA-E9-A1RH-01A-21R-A169-07	3.04625	4.19157
								TCGA-E9-A1RI-01A-11R-A169-07	3.76848	-0.66699
								TCGA-E9-A226-01A-21R-A157-07	0.779766	2.64339
								TCGA-E9-A227-01A-11R-A157-07	-0.00129575	-2.14048
								TCGA-E9-A228-01A-31R-A157-07	-4.81737	3.80527
								TCGA-E9-A229-01A-31R-A157-07	5.51923	-0.560484
								TCGA-E9-A22A-01A-11R-A157-07	5.71845	-1.26548
								TCGA-E9-A22B-01A-11R-A157-07	1.33029	0.195349
								TCGA-E9-A22D-01A-11R-A157-07	-4.31699	-0.746057
								TCGA-E9-A22E-01A-11R-A157-07	9.34643	-1.47602
								TCGA-E9-A22H-01A-11R-A157-07	-7.30923	2.34912
								TCGA-E9-A245-01A-22R-A16F-07	-1.85158	-0.335213
								TCGA-E9-A247-01A-11R-A169-07	-2.17871	0.809151
								TCGA-E9-A248-01A-11R-A169-07	-3.53654	3.09907
								TCGA-E9-A249-01A-11R-A169-07	-4.3501	0.994736
								TCGA-E9-A24A-01A-11R-A169-07	0.0217606	-0.844804
								TCGA-E9-A295-01A-11R-A16F-07	2.76657	-1.4836
								TCGA-E9-A2JS-01A-11R-A180-07	-1.95073	1.82985
								TCGA-E9-A2JT-01A-22R-A18M-07	-0.25309	-5.79416
								TCGA-E9-A3HO-01A-11R-A213-07	-4.49793	-1.57005
								TCGA-E9-A3Q9-01A-11R-A21T-07	-4.08749	-3.54816
								TCGA-EW-A1IW-01A-11R-A13Q-07	2.11468	-0.352431
								TCGA-EW-A1IX-01A-12R-A144-07	5.93167	-3.23592
								TCGA-EW-A1IY-01A-11R-A13Q-07	1.1154	2.06639
								TCGA-EW-A1J1-01A-11R-A13Q-07	-5.66009	2.13486
								TCGA-EW-A1J2-01A-21R-A13Q-07	4.693	-3.33768
								TCGA-EW-A1J3-01A-11R-A13Q-07	-1.74499	1.5138
								TCGA-EW-A1J5-01A-11R-A13Q-07	-2.35259	-0.837944
								TCGA-EW-A1J6-01A-11R-A13Q-07	-5.98385	0.844706
								TCGA-EW-A1OV-01A-11R-A144-07	-0.472021	-1.89717
								TCGA-EW-A1OX-01A-11R-A144-07	-10.9519	4.89636
								TCGA-EW-A1OY-01A-11R-A144-07	-2.77064	2.51136
								TCGA-EW-A1OZ-01A-11R-A144-07	2.83015	1.91773
								TCGA-EW-A1P0-01A-11R-A144-07	-5.29168	3.59022
								TCGA-EW-A1P3-01A-11R-A144-07	0.982336	-2.33565
								TCGA-EW-A1P5-01A-11R-A144-07	-1.13886	-0.384168
								TCGA-EW-A1P6-01A-11R-A144-07	-1.32582	0.574528
								TCGA-EW-A1PA-01A-11R-A144-07	-0.915836	-0.25273
								TCGA-EW-A1PC-01B-11R-A21T-07	-1.60547	2.91912
								TCGA-EW-A1PD-01A-11R-A144-07	4.59504	-0.153942
								TCGA-EW-A1PE-01A-11R-A144-07	1.53704	-1.78337
								TCGA-EW-A1PG-01A-11R-A144-07	7.58197	-2.3143
								TCGA-EW-A2FR-01A-11R-A21T-07	11.8038	-2.03558
								TCGA-EW-A2FS-01A-11R-A17B-07	-0.74432	-1.72439
								TCGA-EW-A2FV-01A-11R-A17B-07	-0.62788	-0.465763
								TCGA-EW-A2FW-01A-11R-A17B-07	-4.1916	1.84021
								TCGA-GI-A2C8-01A-11R-A16F-07	4.02309	-3.95014
								TCGA-GM-A2D9-01A-11R-A18M-07	2.61474	-3.3298
								TCGA-GM-A2DB-01A-31R-A18M-07	0.164139	-0.652384
								TCGA-GM-A2DC-01A-11R-A18M-07	-3.7181	0.785811
								TCGA-GM-A2DD-01A-11R-A180-07	5.28861	-2.93104
								TCGA-GM-A2DH-01A-11R-A180-07	-1.87582	0.683218
								TCGA-GM-A2DI-01A-31R-A18M-07	4.87079	-4.17951
								TCGA-GM-A2DK-01A-21R-A180-07	2.51495	-3.55541
								TCGA-GM-A2DL-01A-11R-A18M-07	7.85113	-1.52332
								TCGA-GM-A2DM-01A-11R-A180-07	-4.17934	-1.37212
								TCGA-GM-A2DN-01A-11R-A180-07	2.06237	-2.78336
								TCGA-GM-A2DO-01A-11R-A18M-07	-4.09318	-5.38266
								TCGA-GM-A3NY-01A-11R-A21T-07	1.1696	-3.69852
